# 1 Lineage recording of zebrafish 2 embryogenesis reveals historical 3 and ongoing lineage commitments

4 Zhuoxin Chen<sup>1</sup>, Chang Ye<sup>1</sup>, Zhan Liu<sup>1</sup>, Shanjun Deng<sup>1</sup>, Xionglei He<sup>1\*</sup>, Jin Xu<sup>1\*</sup>

**\*For correspondence:**

5 [hexiong1@mail.sysu.edu.cn](mailto:hexiong1@mail.sysu.edu.cn) (XLH);  
6 [xujin7@mail.sysu.edu.cn](mailto:xujin7@mail.sysu.edu.cn) (JX)

<sup>†</sup>These authors contributed  
equally to this work

5 <sup>1</sup>State Key Laboratory of Biocontrol, School of Life Sciences, Sun Yat-sen University,  
6 Guangzhou, 510275, China

7  
8 **Abstract** It has been challenging to characterize the lineage relationships among cells in  
9 vertebrates, which comprise a great number of cells. Fortunately, recent progress has been made  
10 by combining the CRISPR barcoding system with single-cell sequencing technologies to provide  
11 an unprecedented opportunity to track lineage at single-cell resolution. However, due to errors  
12 and/or dropouts introduced by amplification and sequencing, reconstruction of accurate lineage  
13 relationships in complex organisms remains a challenge. Thus, improvements in both  
14 experimental design and computational analysis are necessary for lineage inference.  
15 In this study, we employed single-cell Lineage tracing On Endogenous Scarring Sites (scLOESS), a  
16 lineage recording strategy based on the CRISPR-Cas9 system, to trace cell fate commitments for  
17 zebrafish larvae. With rigorous quality control, we demonstrated that lineage commitments of  
18 complex organisms could be inferred from a limited number of barcoding sites. Together with  
19 cell-type characterization, our method could homogeneously recover lineage information. In  
20 combination with the cell-type and lineage information, we depicted the development histories  
21 for germ layers as well as cell types. Furthermore, when combined with trajectory analysis, our  
22 methods could capture and resolve the ongoing lineage commitment events to gain further  
23 biological insights into later development and differentiation in complex organisms.

## 24 **Introduction**

25 Resolving the lineage relationships among cells from a zygote to understand the process of cell  
26 proliferation and differentiation is of great interest in the field of developmental biology. So far,  
27 only the lineage of nematode *Caenorhabditis elegans* has been successfully tracked at single-cell  
28 resolution (*Deppe et al., 1978; Sulston et al., 1983; Sulston and Horvitz, 1977*). There has been  
29 little progress in non-eutelic, multicellular organisms due to their large number of cells and opac-  
30 ity. Recently, by combining single-cell RNA-sequencing (scRNA-seq) with the CRISPR-Cas9 system,  
31 many researchers have developed new strategies to simultaneously record the lineage histories  
32 and characterize cell types. These approaches have provided unprecedented opportunities to un-  
33 derstand the development and physiology of different organisms (*Alemanly et al., 2018; Chan et al.,*  
34 *2019; Raj et al., 2018; Spanjaard et al., 2018*).

35  
36 One challenge in utilizing this system is the number of scars created by the CRISPR system  
37 is limited compared to the huge number of cells in an individual. In addition, technical issues,  
38 such as low recovery rates of barcoding sites, recurring mutations and chimeric reads, are barriers  
39 for accurate lineage relationship reconstruction (*Spanjaard et al., 2018; Wang and Wang, 1997*).  
40 Further optimization of experimental design and data processing is essential to improve the signal-

41 to-noise ratio.

42 In our previous study, we proposed a method using the CRISPR-Cas9 system to edit endogenous  
43 sites for lineage recording, which has higher recording capacity and recovery rates than previous  
44 methods (Ye *et al.*, 2020). In this study, we applied this method (called scLOESS) to track the lineage  
45 of cells from 7dpf zebrafish larvae. With rigorous quantification, we demonstrated that the cell  
46 lineage commitments of complex organisms can be inferred from a limited number of barcoding  
47 sites.

## 48 Results

### 49 Characterization of cell types and assignment of germ layers

50 We injected Cas9 mRNA and the 78-sgRNA pool into zebrafish embryos as previously described  
51 (Ye *et al.*, 2020). At 7 days post-fertilization (dpf), an injected embryo was dissociated into single-  
52 cell suspension and subjected to scRNA-seq as well as barcoding-site amplification (Figure 1A). We  
53 obtained more than 12,000 cells with an average of approximately 3,000 unique molecular identi-  
54 fiers (UMIs) and 900 genes per cell. Using an unsupervised clustering approach, we identified 41  
55 clusters and assigned them to particular cell types based on their feature genes (Figure 1B-F and  
56 Figure 1-source data 3) (Butler *et al.*, 2018). Based on information from the Zebrafish Informa-  
57 tion Network (ZFIN) database and previous studies, we further classified these clusters into four  
58 different germ layers (Howe *et al.*, 2013; Thisse and Thisse, 2008). Notably, we identified almost all  
59 the cell types in zebrafish larvae, suggesting that targeting endogenous sites does not noticeably  
60 affect normal development.

### 61 Lineage barcode extraction and tree reconstruction

62 With cell-type characterization, we investigated the mutations on the barcoding sites to reconstruct  
63 lineage relationships among cells. To obtain accurate lineage information, we selected the barcod-  
64 ing sites detected in more than 80% of the cells and mutations that overlapped with the 6 base  
65 pairs upstream of the PAM sequences (Figure 1-source data 1). We further filtered potential se-  
66 quencing errors, such as chimeric reads and doublets as well as recurring mutations, to reduce  
67 the technical noise (see Materials and Methods). After obtaining high-quality mutations, we inves-  
68 tigated the power of our recording system. The confident mutations created on the barcoding  
69 sites were referred to as scars. We found that there were 512 distinct scars in total with various  
70 lengths of insertions and deletions, which is consistent with the mutation spectrum edited by Cas9  
71 (Figure 2A). We found that scars covered 70% of the cells without cell-type and germ-layer bias,  
72 and more than one scar was detected in more than half of the cells (Figure 2B-C). These results  
73 revealed that our method homogeneously marked cells after quality control, which is essential for  
74 a highly informative and accurate lineage recording system.

75 We next reconstructed the lineage relationships using scar network graphs (Spanjaard *et al.*,  
76 2018). Basically, the scars that were created in a descendant cell marked by another scar could be  
77 detected simultaneously with the latter, and the historical relationships of scars could be inferred  
78 from the network (Figure 2D). We reconstructed the lineage tree according to the final network  
79 graph (Figure 2-Figure Supplement 1) and assigned cells to the terminal nodes in the tree based  
80 on their scar profiles (see Materials and Methods). The reconstructed lineage tree revealed that the  
81 cell fates of progenitors become restricted to certain cell types in the same germ layer during em-  
82 bryogenesis (23 out of 85 terminal nodes, Figure 2-Figure Supplement 2). The reconstructed tree  
83 comprised only approximately 10% of the barcoded cells, which was not informative enough for  
84 us to have a closer examination at the lineage relationships between diverse cell types. Although  
85 we could not accurately order all the scars in a lineage tree, cells with identical sets of scars were  
86 very likely to have been developed from the same recent ancestor.

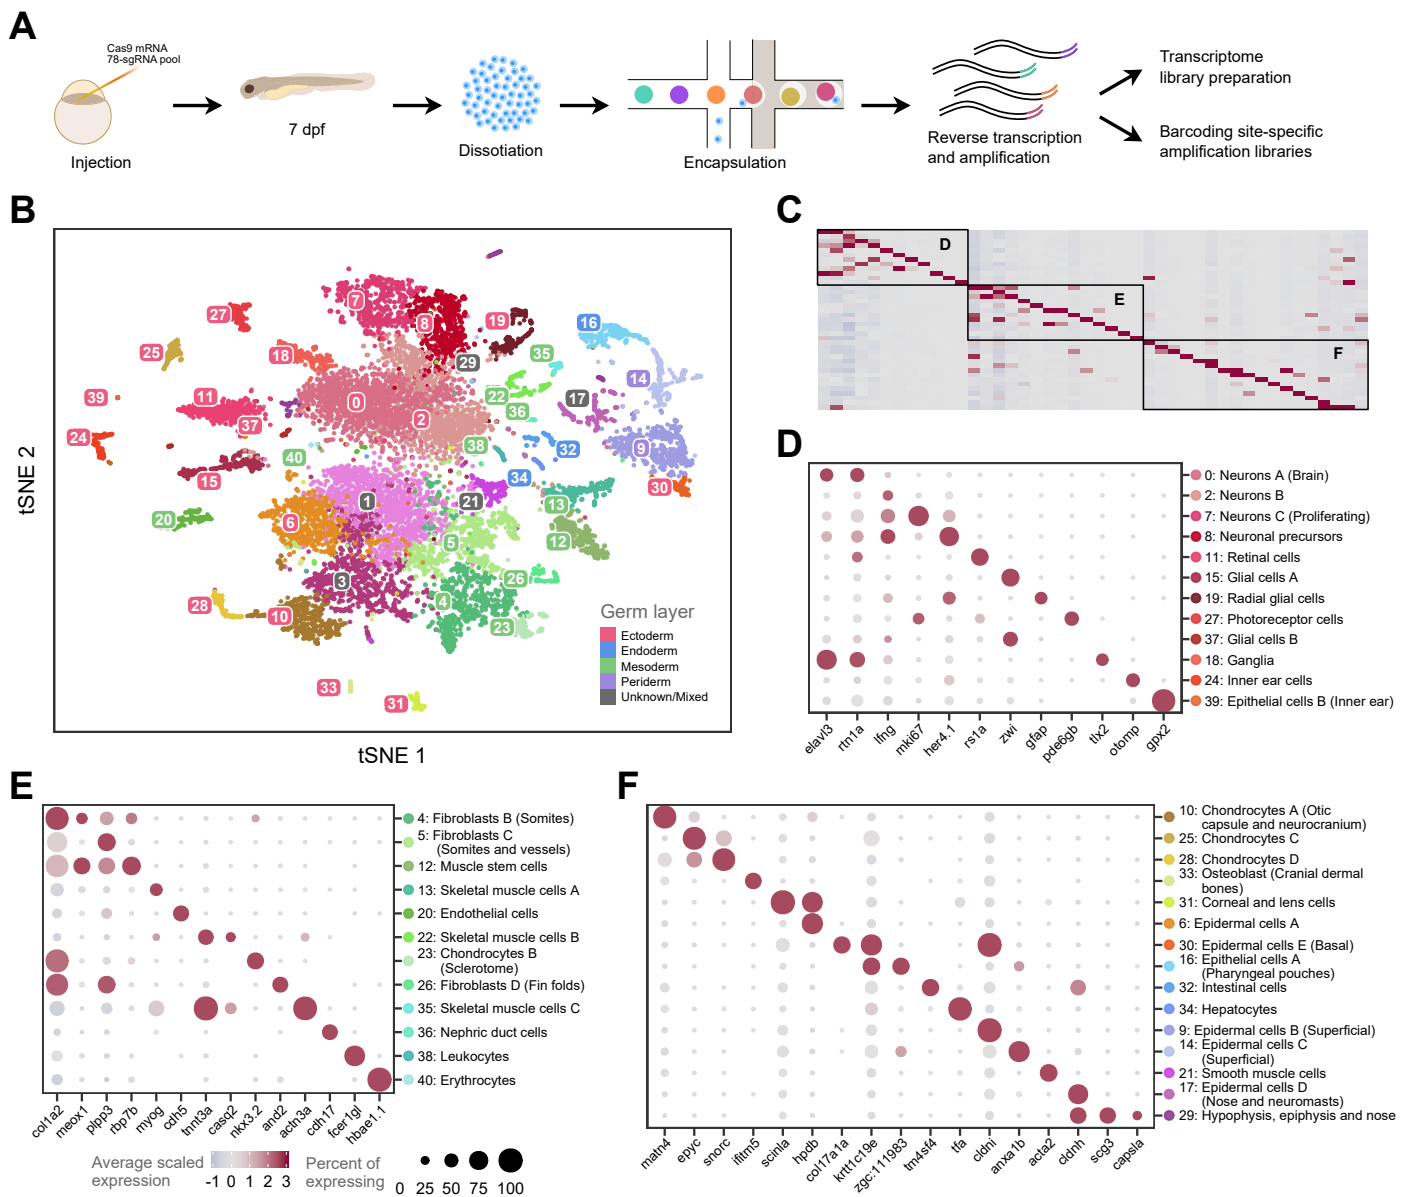

**Figure 1. Cell-type assignment by scRNA-seq.** (A) Schematic of simultaneous detection of single-cell transcriptome and lineage information. (B) t-SNE plot of 12,975 cells from zebrafish larva (7 dpf) clustered into 41 groups. Based on the differentially expressed genes, each group was assigned to different cell types and germ layers, as indicated by the color code on the y-axis (D to E) and the legend. Cell types with unknown or mixed origins are labeled in gray. (C) Heatmap of scaled expression of representative marker genes for each cell type. The detailed information is shown in (D-E). (D-E) Dot plot of representative marker genes of diverse cell types from the neural tube (including posterior placodal area), mesoderm, and others, respectively. Dot size denotes the fraction of cells expressing the marker genes and the color indicates the average scaled expression level.

**Figure 1-Figure supplement 1.** The distribution of UMI number per cell with different marker genes.

**Figure 1-source data 1.** Targets.

**Figure 1-source data 2.** Primers.

**Figure 1-source data 3.** Maker genes of various cell types.

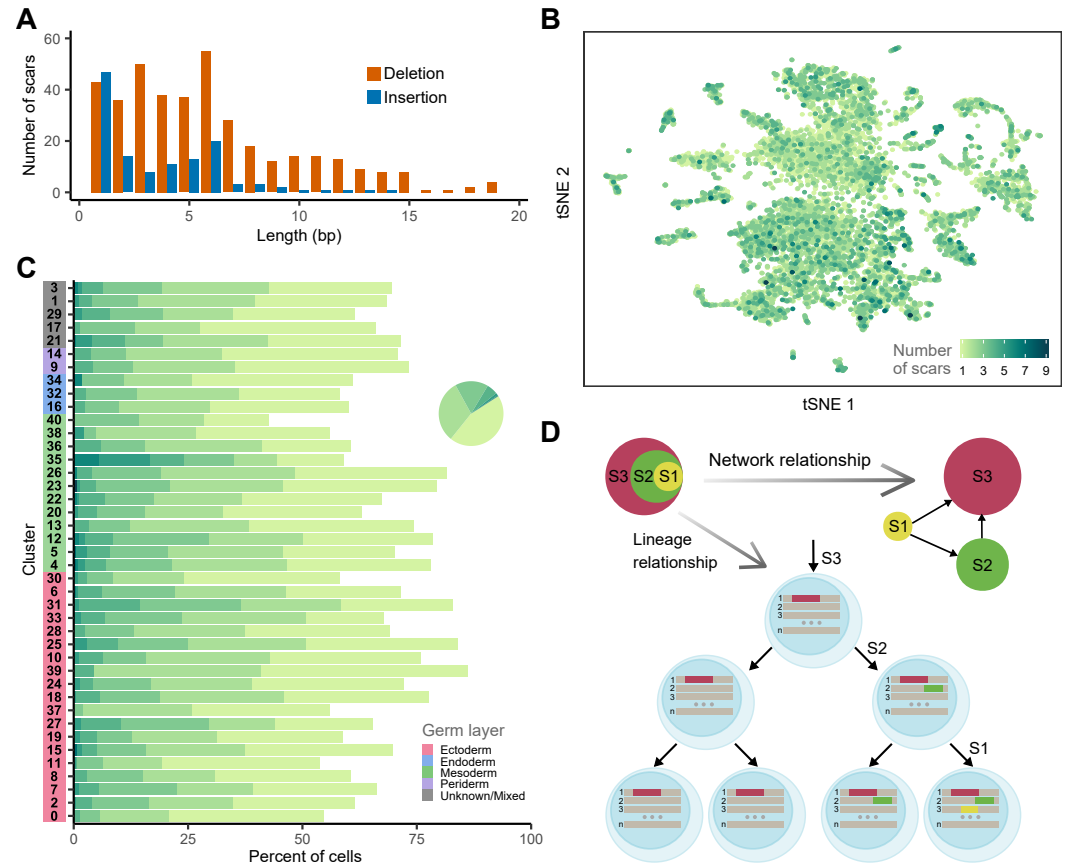

**Figure 2. Lineage barcoding in zebrafish larvae by scLOESS.** (A) Length distribution for deletions and insertions of various scars. (B) t-SNE representation of cells colored by the number of detected scars. Most of the cells were marked by more than one scar, indicating the ability of broadly endogenous barcoding of scLOESS. (C) Proportion of cells with a different number of scars within each end type. The colors in the y-axis indicate the germ layer from which the cells originated. Color code for the number of scars is as indicated in (B). Pie chart shows the fractions of cells with a different number of scars. (D) Example of lineage tree reconstruction from unambiguously placed scars. For all pairs of scars, their inclusion relationships can be illustrated using a network graph and then reconstructing the lineage relationships among cells based on their scar profiles.

**Figure 2-Figure supplement 1.** Network relationships of non-recurring scars.

**Figure 2-Figure supplement 2.** The reconstructed lineage tree for 7 days post-fertilization zebrafish larva.

**Figure 2-Figure supplement 3.** Proportions of less frequent scars per site in individual cells with various number of scars.

**Figure 2-Figure supplement 4.** Scar networks before filtering.

## 87 **Reconstructed lineage relationships reveal developmental histories**

88 We next investigated whether the lineage information recapitulated more comprehensive develop-  
89 mental histories in zebrafish. To depict accurate lineage relationships among different cell types,  
90 we further excluded scarring paths that may have been created right before differentiation (see Ma-  
91 terials and Methods). As expected, most of the remaining scarring paths (>75%) were germ-layer-  
92 restricted. Compared to random sampling based on the number of cells in each germ layer and  
93 scarring path (**Figure 3–Figure Supplement 1A**), the observed number of path-marked cells within a  
94 single germ layer was substantially larger than expected (**Figure 3A**). We also noticed that in germ-  
95 layer-specific paths, most cell types were connected to multipotent stem cells (cluster 4 for meso-  
96 derm is shown in **Figure 3B**, cluster 7 for ectoderm is shown in **Figure 3–Figure Supplement 1B**).  
97 These results indicate that during development, progenitors give rise to both differentiated cells  
98 and stem cells that retain their capacity to differentiate into other cell types. To further quantify  
99 the lineage connection between cell types, we counted and normalized the connections between  
100 each pair of cell types in the filtered scarring paths and presented the lineage relationships using a  
101 circular plot (**Figure 3C**). We found that cells originating from the same regions displayed a higher  
102 degree of common ancestry, which agrees with the developmental history (**Kimmel et al., 1990**).  
103 These results demonstrate the power of our method to recapitulate the cell fate commitments  
104 during early development in zebrafish.

105 We found that the most prominent connection was in periderm (also known as the enveloping  
106 layer (EVL); cluster 9, 14), which is the earliest cell commitment event in zebrafish development  
107 (**Haddon and Lewis, 1996; Kimmel et al., 1990, 1995; Lee et al., 2014; Teixeira Rosa et al., 2019**).  
108 We also noticed that epidermal cells of the nose (cluster 17) had a strong lineage relationship with  
109 cells from the periderm, suggesting that a portion of those cells were descendants of the perid-  
110 erm. Nevertheless, there was an unexpected connection between intestinal cells (cluster 32) and  
111 epidermal cells C (cluster 14), which was due to incorrect clustering and annotation of intestinal  
112 cells, according to the selected feature genes (**Ivanova et al., 2015**).

113 Furthermore, the connections between different cell types provided detailed information on lin-  
114 eage commitment during development. For example, a portion of skeletal muscle cells (cluster 22)  
115 and endothelial cells (cluster 20) shared a common developmental origin (**Figure 3C** and **Figure 3–**  
116 **Figure Supplement 3**). Inspection of the expression signature of these cells revealed that they  
117 are posterior cardinal vein endothelial cells (*lyve1a*<sup>+</sup>) and pectoral fin muscle cells (*casq2*<sup>+</sup>), both  
118 of which are derived from the posterior lateral plate mesoderm (PLPM) (**Cleaver and Krieg, 1998;**  
119 **Fouquet et al., 1997; Hamburger and Hamilton, 1951; Martin, 1998; Zhong et al., 2001**). Moreover,  
120 there has been controversy as to whether the trunk neural crest contributes to the fin mesenchyme  
121 (**Green et al., 2015**). Our results showed that fin fibroblasts (cluster 26) shared a common lineage  
122 origin with cells from the paraxial mesoderm (cluster 4, 23) instead of the neural crest, which was  
123 consistent with a recent study by **Lee et al. (2013)**.

124 The neural crest is a migratory embryonic cell population that gives rise to a wide variety of cell  
125 types, including the craniofacial skeletal cells, cornea cells, and smooth muscle cells (**Akula et al.,**  
126 **2019; Etchevers et al., 2001; His, 1868; Kague et al., 2012**). Remarkably, our results showed that  
127 cluster 31, comprising cornea and lens cells, shared close lineage relationships with cells from the  
128 neural crest (cluster 10) and surface ectoderm (cluster 6), which was in agreement with the organo-  
129 genesis of vertebrate eye (**Greiling and Clark, 2009; Langenberg et al., 2008; Soules and Link, 2005;**  
130 **Tamm, 2011; Yoshikawa et al., 2007**). Our results also revealed that cells derived from the poste-  
131 rior placodal area, another thickening of the ectoderm, were more closely related (**Ladher et al.,**  
132 **2010**). As shown in **Figure 3C**, ganglia (cluster 18), which contain the statoacoustic (VIII) ganglia and  
133 epibranchial ganglia, had a shared lineage origin with inner ear cells (cluster 24). This finding was  
134 also consistent with previous studies (**Freter et al., 2008; Haddon and Lewis, 1996; Sun et al., 2007;**  
135 **Wikstrom and Anniko, 1987**).

136 Collectively, these results demonstrate that our method can decipher the developmental histo-

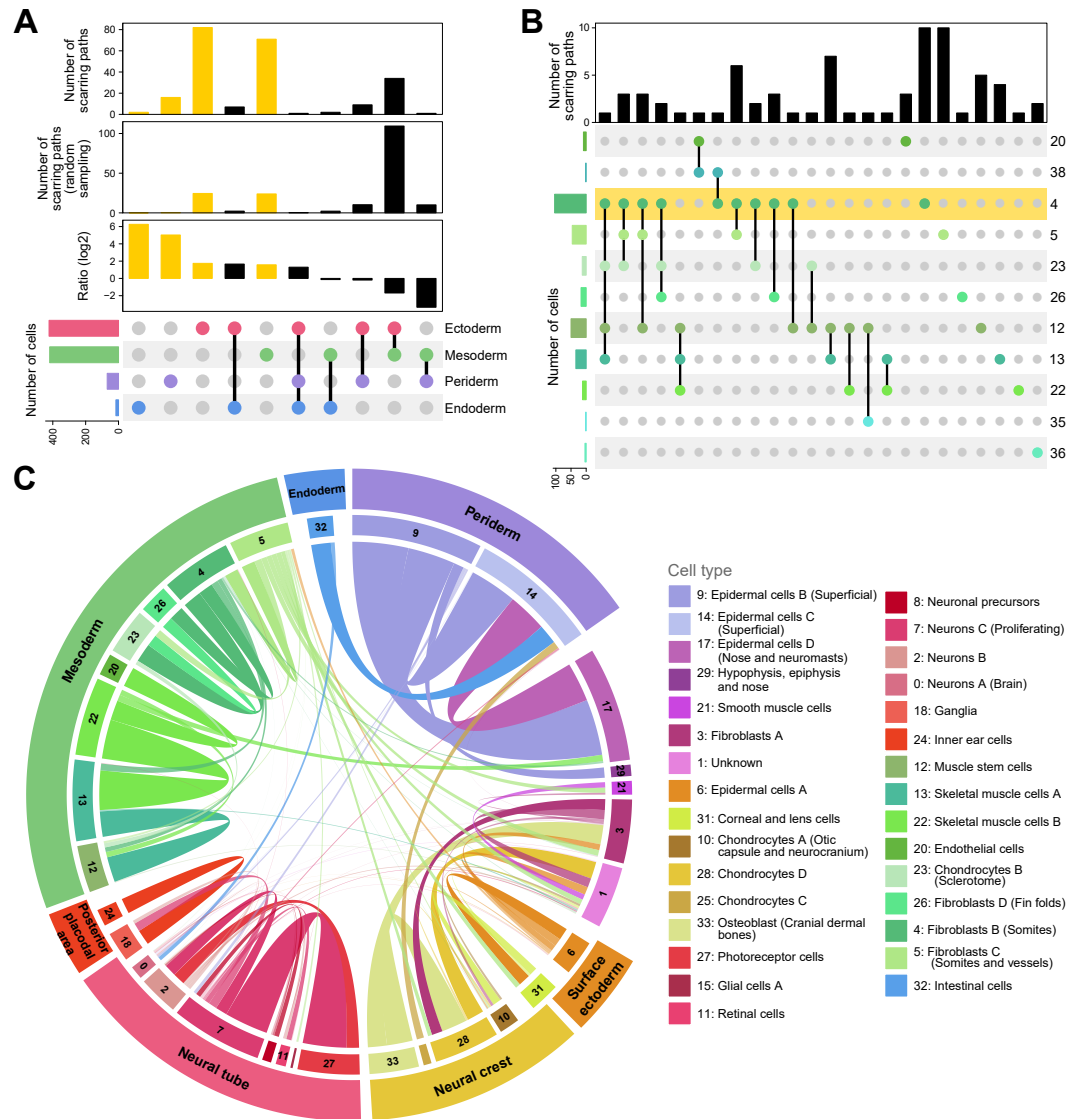

**Figure 3. Lineage relationships between different cell types.** (A) Upset plot showing the number of scarring paths detected within or between distinct germ layers. The top two bar plots showing the number of scarring paths from our data (observed) and random sampling, based on the cell number of each germ layer (expected). The bottom bar plot showing the ratios (log2 scale) between the observed and expected number of paths. Scarring paths containing cells from unknown/mixed germ layers are removed. Yellow bars indicate scarring paths that were only detected in cells from one germ layer. The color code for the germ layers is as annotated in *Figure 1B*. (B) Upset plot for the number of scarring paths detected within or between cell types from the mesoderm. The color code for cell types is as annotated in *Figure 1E*. The yellow shade represents multipotent stem cells. (C) Chord diagram for relative lineage connection strengths, in which links between cell types represent lineage connections. The link widths are proportional to the ratio of the observed connections to all possible connections between each pair of cell types. Connections between cells within the same cell type are removed for clarity. The alpha transparencies of links are scaled by their ranks (1 for the top 25%, 0.75 for the top 25–50%, 0.5 for the top 50–75%, and 0.25 for the rest). The ectoderm is further divided into the neural tube, neural crest, posterior placodal area, and surface ectoderm.

**Figure 3–Figure supplement 1.** Lineage information for simulation.

**Figure 3–Figure supplement 2.** Fin muscle cells share a close relationship with endothelial cells.

**Figure 3–Figure supplement 3.** Comparison of various methods for single-cell lineage tracing in vertebrates.

**Figure 3–Figure supplement 4.** The relationship of the number of cell types and the proportions of the top two cell types.

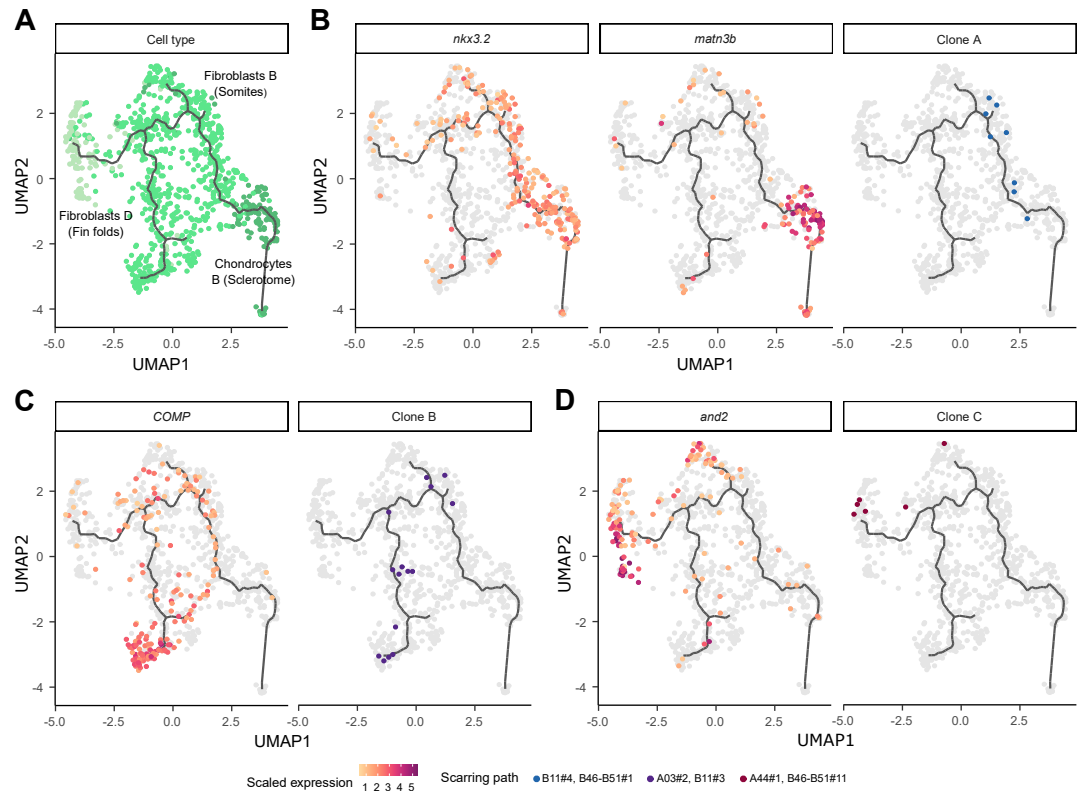

**Figure 4. Scarring paths track ongoing lineage commitment.** (A) UMAP visualization of cells in the paraxial mesoderm with the inferred trajectories generated by Monocle3. Color code for the cell types is as in [Figure 1](#). (B-D) Expression patterns of marker genes for the sclerotome (*nkx3.2* and *matn3b*), myotome boundaries (*COMP*), or fin fold mesenchyme (*and2*), as well as the cells marked by the same scarring path along the trajectories.

**Figure 4-Figure supplement 1.** Transcriptional transition along different trajectories.

**Figure 4-Figure supplement 2.** Site frequency spectrum of different trajectories.

137 ries of thousands of cells during embryogenesis.

### 138 Tracking ongoing lineage commitment

139 As cell proliferation and differentiation are still ongoing at 7 dpf, we wondered whether we could  
 140 detect current lineage commitment events using our strategy. During ontogenesis, progenitor cells  
 141 become biased toward certain fates by changing their transcriptional states. It is known that mes-  
 142 enchymal cell (fibroblast) fate commitment in the paraxial mesoderm is still ongoing during the  
 143 larva stage ([Hollway et al., 2007](#); [Lleras Forero et al., 2018](#)). Therefore, we applied pseudo-time  
 144 analysis based on expression signatures to predict the developmental trajectories. We first ana-  
 145 lyzed the cell trajectories of fibroblasts in the paraxial mesoderm and then investigated how these  
 146 cell trajectories supported by their lineage information ([Figure 4A](#)) ([Crotwell and Mabee, 2007](#);  
 147 [Maradonna et al., 2013](#); [Morin-Kensicki and Eisen, 1997](#)). We found that the progenitor cells in  
 148 the paraxial mesoderm would gradually acquire fates of either the sclerotome (*nkx3.2*<sup>+</sup>, *matn3b*<sup>+</sup>),  
 149 myotome boundaries (*COMP*<sup>+</sup>), or fin fold mesenchyme (*and2*<sup>+</sup>) ([Figure 4B-D](#), [Figure 4-Figure Sup-](#)  
 150 [plement 1](#)) ([Crotwell and Mabee, 2007](#); [Ko et al., 2005](#); [Zhang et al., 2010](#)). Cells with the same  
 151 scarring path matched either single (4 in 16 scarring paths with more than 5 cells) or multiple tra-  
 152 jectories (12 in 16 scarring paths) ([Figure 4B-D](#)).

153 However, the number of cells with the same scarring path is too limited to tell how these progen-  
 154 itor cells determine their fates, when there are multiple routes. We further estimated the effective  
 155 population size of each trajectory, based on the principle from population genetics ( $N_e = \frac{\hat{\pi}}{2\mu}$  for

156 haploidy genome). The genetic diversity ( $\hat{\theta}_w$ ) of each cell population was estimated from the scar-  
157 ring paths under the infinite sites model (Kimura, 1971, 1969). Interestingly, the genetic diversity of  
158 cells within the trajectory toward fin was the lowest ( $\hat{\theta}_w$  for the myotome, sclerotome, and fin were  
159 7.69, 6.41, and 4.76, respectively) (Watterson, 1975). As the scaring path was created earlier, we as-  
160 summed the mutation rate is equal for each population and deduced that the population size of the  
161 progenitors contributed to fin fold mesenchyme was 62% of the myotome (Figure 4–Figure Supple-  
162 ment 2). It has been reported that fin fold mesenchyme mainly derives from the marginal region  
163 of the paraxial mesoderm, which may reduce the effective progenitor population size (Lee et al.,  
164 2013). Taken together, our results indicate fibroblasts may commit to different fates stochastically,  
165 while spatial and signaling information can shape their behavior and lineage potential.

166 In summary, our results confirmed the ability of scLOESS to capture and resolve the ongoing  
167 lineage commitment events and gain further biological insights into the development and differ-  
168 entiation of complex organisms.

## 169 Discussion

170 The application of scLOESS in zebrafish larvae revealed that it was powerful enough to decipher  
171 cell fate commitment during the early development of complex multicellular organisms. Taking  
172 advantage of distinguishable endogenous barcoding sites, our method exhibited higher recording  
173 capacity and recovery rates than previous methods (Figure 3–Figure Supplement 3). We demon-  
174 strated that accurate lineage relationships could be reconstructed from dozens of high-quality bar-  
175 coding sites, which was consistent with the simulations in a previous study (Salvador-Martínez  
176 et al., 2019). This was achieved by filtering out less homogeneously captured barcoding sites and  
177 potential chimeric reads (see Materials and Methods), thus improving the performance of our strat-  
178 egy. Future incorporation of more barcoding sites could facilitate the reconstruction of a higher-  
179 resolution fate map.

180 As mentioned above, scLOESS not only recapitulated cell ancestry, but also shed light on tem-  
181 poral relationships of cell differentiation. Although our method exhibited several advantages, limi-  
182 tations were also notable. Reconstruction of accurate lineage trees was hampered because of the  
183 stochasticity of mutation generation by the CRISPR system, which was uncoupled with the cell cy-  
184 cle and resulted in recurring scar formation. Moreover, lack of a continuous barcoding system in  
185 our design hindered investigation of later developmental stages. Hence, future incorporation of  
186 scLOESS into an inducible system may be necessary to unravel relationships at various timepoints.

187 Although targeting endogenous sites potentially could have affected the normal development  
188 of zebrafish, we identified most of the cell types in our scRNA-seq data, implying that disruption of  
189 normal development was not a major concern. However, it is worth noting that the number of lens  
190 cells was relatively small compared with previous studies (Spanjaard et al., 2018). With a careful  
191 examination of the raw data, we found that this was due to their overall low expression levels  
192 (Figure 1–Figure Supplement 1), rendering them unable to pass the initial threshold (>500 UMIs)  
193 for downstream analysis. Nevertheless, we did not attempt to retrieve all the lens cells because  
194 they most likely had few reads on our barcoding sites. This suggests that our method may not be  
195 suitable for tracking lineages with low expression levels.

196 Further combination of our method with spatial scRNA-seq technology may help to illustrate  
197 more comprehensive and accurate fate mapping because clusters uncovered by droplet-based  
198 scRNA-seq comprise cells from mixed origins (Figure 1 and Figure 3C). Thus, we anticipate that  
199 scLOESS will lead us toward fine-resolution, spatiotemporal fate mapping of vertebrate develop-  
200 ment.



## 201 **Methods and Materials**

### 202 **Zebrafish microinjection and library preparation**

203 Wild-type (AB) zebrafish were maintained at 28.5°C under a 14-h light/10-h dark cycle. The Cas9  
204 mRNA and 78-sgRNA pool were generated by in vitro transcription, as described previously (*Ye*  
205 *et al.*, 2020). For high-information lineage tracing, we injected one-cell stage embryos with a mix-  
206 ture of 2 nl Cas9 mRNA (final concentration 350 ng/μl) and the 78-sgRNA pool (final concentrations  
207 585 ng/μl and 7.5 ng/μl, respectively).

208 Single-cell suspension was prepared from a 7 dpf zebrafish larva, which was filtered through a  
209 35-μm strainer and subjected to the 10× Genomics Chromium Single Cell 3' Library & Gel Bead Kit  
210 v2, with minor modifications to the manufacturer's instructions. Specifically, after the first cDNA  
211 amplification (a total of 9 amplification cycles) and cleanup procedures, the amplification product  
212 was divided into two equal aliquots. One aliquot was fragmented and used for the conventional  
213 scRNA-seq library preparation. The other aliquot was reserved for target-specific amplification ex-  
214 periments, consisting of three replicates. Explicitly, 1 μg of cDNA library was first amplified for 15  
215 cycles using the cDNA\_READ1 and cDNA\_TSO primers (*Figure 1–source data 2*). Afterwards, the am-  
216 plicons were purified and split into 90 equal aliquots for site-specific amplification, in which each  
217 site was amplified for another 25 cycles with the cDNA\_READ1 and cDNA\_target primers. Then,  
218 the PCR products were mixed in equimolar amounts after purification, followed by the addition  
219 of Illumina compatible adaptors for NGS sequencing. All PCR reactions were performed using Q5  
220 High-Fidelity DNA Polymerase, and the primer sequences used in this study are listed in *Figure 1–*  
221 *source data 2*. Next, both the scRNA-seq and the amplicon library were analyzed using the Agilent  
222 2100 Bioanalyzer and sequenced on the Illumina HiSeq X platform (PE150 mode), while incorpo-  
223 rating 30% of the spike-in DNA.

224 All animal experiments were performed in accordance with the Animal Research and Ethics  
225 Committees of Sun Yat-Sen University and the National Guidelines for the Care and Use of Labora-  
226 tory Animals (China).

### 227 **Cell type identification**

228 The resulting transcriptome library was mapped to the reference genome (GRCz11) using Cell  
229 Ranger 3.1.0, and cells with fewer than 500 UMIs were excluded. Then, we used the Seurat version  
230 3.1.2 for clustering and identification of differentially expressed genes as described below (*Butler*  
231 *et al.*, 2018). We first discarded genes that were found in fewer than three cells as well as cells  
232 that expressed fewer than 200 of those genes. Next, gene expression was log-normalized and the  
233 top 2,000 most variable genes were selected for principal component analysis. Using the Louvain  
234 algorithm, cells were clustered into 41 groups with the top 40 components and a resolution of 1.8.  
235 Finally, the differentially expressed genes were identified for each cluster (FindAllMarkers function,  
236 only.pos = TRUE, min.pct = 0.25, logfc.threshold = 0.3), and cell-type information was assigned to  
237 each cluster based on the top 50 differentially expressed genes (*Figure 1–source data 3*), based on  
238 the knowledge from literature and the ZFIN database (*Howe et al.*, 2013). Information regarding  
239 the germ layers from which different cell types were derived was also carefully retrieved.

### 240 **Scar analysis**

241 Together with the three barcoding site-specific amplification libraries and the standard transcrip-  
242 tome library, we had four replicates for scar identification. The site-specific libraries were also  
243 mapped to the reference genome using Cell Ranger 3.1.0. We first filtered out reads with uncor-  
244 rected cell barcodes that were not in the filtered cell barcode matrix. Then, reads that could be  
245 mapped to the barcoding sites were extracted for each site, respectively, and mutated reads (with  
246 CIGAR strings containing "I/D") were deduplicated and merged using CAP3 and then mapped to the  
247 reference target sequences using MAFFT version 7.402 (*Huang and Madan, 1999; Katoh and Stand-*  
248 *ley, 2013*). The reference sequences were manually trimmed to the shortest blocks that covered all

249 the indels that overlapped with the barcoding sites. This step mitigated the impact of sequencing  
250 errors surrounding the barcoding sites in downstream analysis. Afterwards, the information for  
251 replicate identification, cell barcodes, and UMI sequences of each sequence were extracted. Then,  
252 the reads were mapped to the reference sequences using T-COFFEE (Version\_11.00) for more ac-  
253 curate alignment and were transformed into a four-letter sequence, as described previously (*Perli*  
254 *et al., 2016*). Aligned sequences were only considered to the PAM sequence for each site. Because  
255 heterogeneously presented barcoding sites (sequencing dropouts) can influence the accuracy of  
256 lineage reconstruction, we excluded sites that were detected in less than 80% of the cells; therefore,  
257 49 barcoding sites remained.

258 For all the droplet-based single-cell sequencing methods, there are three major errors that can  
259 affect the accuracy of scar analysis: amplification and sequencing errors, chimeric reads, and dou-  
260 blets/multiplets (*Wang and Wang, 1997*). Thus, we performed multiple filtering steps to mitigate  
261 the impact of these errors, according to the following criteria. 1) If there were wild-type and mu-  
262 tant sequences for the same UMI in the same cell, we selected the sequences with the highest  
263 replicate counts. 2) If there was more than one scar for the same UMI, then the scar with the most  
264 replicates in that cell or with the fewest mismatches was chosen for downstream analysis. 3) For  
265 each cell, if there were scars with the same core scar (23 bp) but different full scars (trimmed block)  
266 of the same length, then they were considered as the same. 4) We further merged scars that had  
267 Hamming distances of 1, unless there was a single-nucleotide polymorphism (SNP) surrounding  
268 the barcoding site (see *Figure 1–source data 1*). 5) We incorporated scars that were only detected  
269 in one cell into scars that were detected in multiple cells that had only one mismatch.

270 After completion of the above-mentioned filtering steps for sequencing errors, we counted the  
271 UMI numbers for each scar in individual cells. Although the proportions of chimeric reads could  
272 not be inferred from the wild-type alleles, we estimated it from the cells that had two or more  
273 scars. If there was more than one scar in a cell, it most likely resulted from chimeric reads and/or  
274 doublets/multiplets because the possibility of creating mutations in both alleles was low. Thus,  
275 we calculated the proportions of less frequent scars per site in individual cells (*Figure 2–Figure*  
276 *Supplement 3*). Most of the less frequent scars (75% quantile) accounted for less than 9% of the  
277 total number of UMIs per site; therefore, we filtered out scars that had less than 9% of the total  
278 number of UMIs for each site in single cells. Cells that still had at least two scars in the same  
279 barcoding site (probably doublets/multiplets) as well as scars that were detected in fewer than  
280 three cells were also excluded. Finally, we ranked the scars according to their frequencies in the  
281 barcoding sites, which was used as their identification (e.g., A03#2).

## 282 **Tree reconstruction**

283 To reconstruct an accurate lineage tree, we first calculated the connections of scars. For all pairwise  
284 combinations of scars that were observed in this study, scar S1 was considered to be created next  
285 to scar S2 if the number of cells marked by it was smaller than that of scar S2 and most of the  
286 cells marked by scar S1 were also marked by scar S2, after considering potential dropouts. Thus,  
287 we calculated the percentage of overlaps between scars S1 and S2, and if the overlap was greater  
288 than 60% and supported by at least three cells, then it was considered that there was a connection  
289 between them. This was because the average recovery rate of filtered barcoding sites was 96%.  
290 Therefore, if the recovery rates of each allele were independent, then the possibility of detecting  
291 each barcoding allele could be calculated by  $p(SA) = 1 - \sqrt{1 - p(S)} = 1 - \sqrt{1 - 0.96} = 0.8$ , where  $p(S)$   
292 was the possibility of detecting the barcoding site. Thus, if two scars had a connection (meaning  
293 one scar was created after another), the chance of detecting both scars in the descendant cell was  
294 approximately 60%.

295 Next, because the CRSIRP-Cas9 system may generate recurring mutations, we filtered out scars  
296 that could have been created multiple times. As shown in *Figure 2–Figure Supplement 4A*, if one  
297 scar belonged to two scars and there was no connection between them, then it was a recurring  
298 scar. The initial scar network is shown in *Figure 2–Figure Supplement 4B*. After removing potential

299 recurring scars, there were 42 sub-networks left, representing 42 branches. Thus, according to  
300 the final scar network (**Figure 2-Figure Supplement 1**), we reconstructed the lineage tree of the  
301 zebrafish larva and cells were placed within the terminal nodes based on their scar profiles.

### 302 **Lineage relationship reconstruction**

303 We attempted to test if our method could unravel the canonical lineage relationships among dif-  
304 ferent cell types. We took all the barcoded cells into account and grouped them based on their  
305 scar profiles. Distinct scar profiles were considered to stand for unique lineage clades, and cells  
306 with identical scar profiles were very likely developed from the same recent ancestor. Therefore,  
307 we referred to the scar profiles as scarring paths, and a lineage connection was considered to ex-  
308 ist between a pair of cell types if they were in the same scarring path. First, we selected scarring  
309 paths that contained more than one cell and that were significantly biased toward particular cell  
310 types (one-sided Fisher's exact test, FDR < 0.05). The progenitors marked by the filtered paths were  
311 expected to restrict their developmental potential to certain cell types. Next, to further constrain  
312 the timepoints marked by the scarring paths, we discarded the scarring paths with the top two cell  
313 types that accounted for less than 70% of the cells within them. The rationale for this was that if a  
314 scarring path was created right before differentiation, then progenitors marked by that scarring  
315 path should give rise to a limited number of cell types. As shown in **Figure 3-Figure Supplement 4**,  
316 if the proportion of the top two cell types in a path was less than 70%, then the path was likely  
317 marked by cell types from multiple germ layers.

318 Thus, cell types in the same filtered path were expected to share a closer lineage relationship.  
319 To reconstruct accurate lineage relationships, we summed up the connections between each pair  
320 of cell types in the filtered paths and discarded connections supported by fewer than three cells  
321 of either cell type. Finally, the connection strength was calculated using the ratio of observed  
322 connections to all possible connections between the cells of each cell-type pair. More precisely,  
323 the total connection number observed in our data between cell types A and B was calculated  
324 by  $CO(A - B) = \sum_{i=1}^n a_i \times b_i$  where  $a_i$  and  $b_i$  mean the number of cells from cell type A and B in  
325 path  $i$ , respectively. Furthermore, the number of all possible connections between cell type A  
326 and B was calculated by  $CE(A - B) = \sum_{i=1}^n a_{total} \times b_{total}$ , where  $a_{total}$  and  $b_{total}$  mean the total cell  
327 number in each cell type. Thus, the connection strength of cell type A and B was calculated by  
328  $P(A - B) = CO(A - B)/CE(A - B)$ .

### 329 **Differentiation trajectory analysis**

330 With the top 100 components and a resolution of 0.01, cells from the paraxial mesoderm (clus-  
331 ter 4, 23, 26) were clustered and ordered in pseudo-time using Monocle3 (**Trapnell et al., 2014**).  
332 The differentially expressed genes for each trajectory were identified using spatial autocorrelation  
333 analysis (**Cao et al., 2019**). The gene ontology terms enriched in each gene module along the trajec-  
334 tories were retrieved in the Gene Ontology Resource database (**Ashburner et al., 2000; Consortium,**  
335 **2019**) (**Figure 4-Figure Supplement 1**). We estimated the genetic diversity of progenitors for each  
336 trajectory using the Watterson estimator, which is given by  $\hat{\theta}_w = \frac{K}{a_n}$ , where  $K$  is the number of  
337 scarring paths in the trajectory and  $a_n = \sum_{i=1}^{n-1} \frac{1}{i}$  where  $n$  is the number of cells marked by filtered  
338 scarring paths.

### 339 **Data availability**

340 Single-cell gene expression data are available in the Sequence Read Archive of the National Center  
341 for Biotechnology Information (BioProject ID: PRJNA623798).

### 342 **Acknowledgments**

343 We thank J. Huang and Z. Zhang for technical support.

## 344 Additional information

### 345 Competing interests

346 Competing interests: The authors declare that no competing interests exist.

### 347 Funding

348 This research was supported by the National Key R&D Program of China (grant number 2017YFA0103504  
349 to XLH) and Guangdong Basic and Applied Basic Research Foundation (grant number 2019A1515110387  
350 to JX). The funders had no role in study design, data collection and interpretation, or the decision  
351 to submit the work for publication.

### 352 Author contributions

353 Zhuoxin Chen, Conceptualization, Methodology, Software, Data curation, Formal analysis, Inves-  
354 tigation, Writing – original draft, Writing – review and editing; Chang Ye, Software, Investigation,  
355 Resources, Writing – review and editing; Zhan Liu, Investigation, Resources; Shanjun Deng, Soft-  
356 ware, Resources; Xionglei He, Conceptualization, Writing – review and editing, Supervision, Fund-  
357 ing Acquisition; Jin Xu, Conceptualization, Methodology, Writing – original draft, Writing – review  
358 and editing, Supervision, Funding Acquisition, Project administration

### 359 References

- 360 **Akula M**, Park JW, West-Mays JA. Relationship between neural crest cell specification and rare ocular diseases.  
361 *Journal of neuroscience research*. 2019 1; 97(1):7–15. doi: [10.1002/jnr.24245](https://doi.org/10.1002/jnr.24245).
- 362 **Alemanly A**, Florescu M, Baron CS, Peterson-Maduro J, Van Oudenaarden A. Whole-organism clone tracing  
363 using single-cell sequencing. *Nature*. 2018; 556(7699):108–112. doi: [10.1038/nature25969](https://doi.org/10.1038/nature25969).
- 364 **Ashburner M**, Ball CA, Blake JA, Botstein D, Butler H, Cherry JM, Davis AP, Dolinski K, Dwight SS, Eppig JT, et al.  
365 *Gene ontology: tool for the unification of biology*. *Nature genetics*. 2000; 25(1):25–29. doi: [10.1038/75556](https://doi.org/10.1038/75556).
- 366 **Butler A**, Hoffman P, Smibert P, Papalexi E, Satija R. Integrating single-cell transcriptomic data across different  
367 conditions, technologies, and species. *Nature biotechnology*. 2018 6; 36(5):411–420. doi: [10.1038/nbt.4096](https://doi.org/10.1038/nbt.4096).
- 368 **Cao J**, Spielmann M, Qiu X, Huang X, Ibrahim DM, Hill AJ, Zhang F, Mundlos S, Christiansen L, Steemers FJ, et al.  
369 The single-cell transcriptional landscape of mammalian organogenesis. *Nature*. 2019; 566(7745):496–502.  
370 doi: [10.1038/s41586-019-0969-x](https://doi.org/10.1038/s41586-019-0969-x).
- 371 **Chan MM**, Smith ZD, Grosswendt S, Kretzmer H, Norman TM, Adamson B, Jost M, Quinn JJ, Yang D, Jones MG,  
372 Khodaverdian A, Yosef N, Meissner A, Weissman JS. Molecular recording of mammalian embryogenesis.  
373 *Nature*. 2019; 570(7759):77–82. doi: [10.1038/s41586-019-1184-5](https://doi.org/10.1038/s41586-019-1184-5).
- 374 **Cleaver O**, Krieg PA. VEGF mediates angioblast migration during development of the dorsal aorta in *Xenopus*.  
375 *Development*. 1998; .
- 376 **Consortium GO**. The gene ontology resource: 20 years and still GOing strong. *Nucleic acids research*. 2019;  
377 47(D1):D330–D338. doi: [10.1093/nar/gky1055](https://doi.org/10.1093/nar/gky1055).
- 378 **Crotwell PL**, Mabee PM. Gene expression patterns underlying proximal-distal skeletal segmentation  
379 in late-stage zebrafish, *Danio rerio*. *Developmental Dynamics*. 2007 11; 236(11):3111–3128. doi:  
380 [10.1002/dvdy.21352](https://doi.org/10.1002/dvdy.21352).
- 381 **Deppe U**, Schierenberg E, Cole T, Krieg C, Schmitt D, Yoder B, von Ehrenstein G. Cell lineages of the embryo  
382 of the nematode *Caenorhabditis elegans*. *Proceedings of the National Academy of Sciences of the United*  
383 *States of America*. 1978 1; 75(1):376–380. doi: [10.1073/pnas.75.1.376](https://doi.org/10.1073/pnas.75.1.376).
- 384 **Etchevers HC**, Vincent C, Le Douarin NM, Couly GF. The cephalic neural crest provides pericytes and smooth  
385 muscle cells to all blood vessels of the face and forebrain. *Development (Cambridge, England)*. 2001 4;  
386 128(7):1059–1068.
- 387 **Fouquet B**, Weinstein BM, Serluca FC, Fishman MC. Vessel patterning in the embryo of the zebrafish: Guidance  
388 by notochord. *Developmental Biology*. 1997; doi: [10.1006/dbio.1996.8495](https://doi.org/10.1006/dbio.1996.8495).

- 389 **Freter S**, Muta Y, Mak SS, Rinkwitz S, Ladher RK. Progressive restriction of otic fate: The role of FGF and Wnt in  
390 resolving inner ear potential. *Development*. 2008 10; 135(20):3415–3424. doi: [10.1242/dev.026674](https://doi.org/10.1242/dev.026674).
- 391 **Green SA**, Simoes-Costa M, Bronner ME. Evolution of vertebrates as viewed from the crest. *Nature*. 2015 4;  
392 520(7548):474–482. doi: [10.1038/nature14436](https://doi.org/10.1038/nature14436).
- 393 **Greiling TMS**, Clark JI. Early lens development in the zebrafish: a three-dimensional time-lapse analysis. *Devel-*  
394 *opmental dynamics : an official publication of the American Association of Anatomists*. 2009 9; 238(9):2254–  
395 2265. doi: [10.1002/dvdy.21997](https://doi.org/10.1002/dvdy.21997).
- 396 **Haddon C**, Lewis J. Early ear development in the embryo of the zebrafish, *Danio rerio*. *The Journal of compar-*  
397 *ative neurology*. 1996 1; 365(1):113–128. doi: [10.1002/\(SICI\)1096-9861\(19960129\)365:1<textless>113::AID-  
398 CNE9<textgreater>3.0.CO;2-6](https://doi.org/10.1002/(SICI)1096-9861(19960129)365:1<textless>113::AID-CNE9<textgreater>3.0.CO;2-6).
- 399 **Hamburger V**, Hamilton HL. A series of normal stages in the development of the chick embryo. *Journal of*  
400 *Morphology*. 1951; doi: [10.1002/jmor.1050880104](https://doi.org/10.1002/jmor.1050880104).
- 401 **His W**. Untersuchungen über die erste Anlage des Wirbelthierleibes : die erste Entwicklung des Hühnchens  
402 im Ei. Leipzig :: F.C.W. Vogel,; 1868.
- 403 **Hollway GE**, Bryson-Richardson RJ, Berger S, Cole NJ, Hall TE, Currie PD. Whole-Somite Rotation Generates  
404 Muscle Progenitor Cell Compartments in the Developing Zebrafish Embryo. *Developmental Cell*. 2007 2;  
405 12(2):207–219. doi: [10.1016/j.devcel.2007.01.001](https://doi.org/10.1016/j.devcel.2007.01.001).
- 406 **Howe DG**, Bradford YM, Conlin T, Eagle AE, Fashena D, Frazer K, Knight J, Mani P, Martin R, Moxon SAT, Paddock  
407 H, Pich C, Ramachandran S, Ruef BJ, Ruzicka L, Schaper K, Shao X, Singer A, Sprunger B, Van Slyke CE, et al.  
408 ZFIN, the Zebrafish Model Organism Database: increased support for mutants and transgenics. *Nucleic acids*  
409 *research*. 2013 1; 41(Database issue):D854–60. doi: [10.1093/nar/gks938](https://doi.org/10.1093/nar/gks938).
- 410 **Huang X**, Madan A. CAP3: A DNA sequence assembly program. *Genome Research*. 1999 9; 9(9):868–877. doi:  
411 [10.1101/gr.9.9.868](https://doi.org/10.1101/gr.9.9.868).
- 412 **Ivanova AS**, Shandarin IN, Ermakova VG, Minin AA, Tereshina MB, Zaraisky AG. The secreted factor Ag1 missing  
413 in higher vertebrates regulates fins regeneration in *Danio rerio*. *Scientific reports*. 2015 1; 5:8123. doi:  
414 [10.1038/srep08123](https://doi.org/10.1038/srep08123).
- 415 **Kague E**, Gallagher M, Burke S, Parsons M, Franz-Odenaal T, Fisher S. Skeletogenic fate of zebrafish cranial  
416 and trunk neural crest. *PloS one*. 2012; 7(11):e47394. doi: [10.1371/journal.pone.0047394](https://doi.org/10.1371/journal.pone.0047394).
- 417 **Katoh K**, Standley DM. MAFFT multiple sequence alignment software version 7: improvements in performance  
418 and usability. *Molecular biology and evolution*. 2013 4; 30(4):772–780. doi: [10.1093/molbev/mst010](https://doi.org/10.1093/molbev/mst010).
- 419 **Kimmel CB**, Ballard WW, Kimmel SR, Ullmann B, Schilling TF. Stages of embryonic development of the ze-  
420 brafish. *Developmental dynamics : an official publication of the American Association of Anatomists*. 1995  
421 7; 203(3):253–310. doi: [10.1002/aja.1002030302](https://doi.org/10.1002/aja.1002030302).
- 422 **Kimmel CB**, Warga RM, Schilling TF. Origin and organization of the zebrafish fate map. *Development (Cam-*  
423 *bridge, England)*. 1990 4; 108(4):581–594.
- 424 **Kimura M**. The number of heterozygous nucleotide sites maintained in a finite population due to steady flux  
425 of mutations. *Genetics*. 1969; 61(4):893.
- 426 **Kimura M**. Theoretical foundation of population genetics at the molecular level. *Theoretical Population Biology*.  
427 1971 6; 2(2):174–208. doi: [10.1016/0040-5809\(71\)90014-1](https://doi.org/10.1016/0040-5809(71)90014-1).
- 428 **Ko YP**, Kobbe B, Paulsson M, Wagener R. Zebrafish (*Danio rerio*) matriline: Shared and divergent char-  
429 acteristics with their mammalian counterparts. *Biochemical Journal*. 2005 3; 386(Pt 2):367–379. doi:  
430 [10.1042/BJ20041486](https://doi.org/10.1042/BJ20041486).
- 431 **Ladher RK**, O'Neill P, Begbie J. From shared lineage to distinct functions: The development of the inner ear  
432 and epibranchial placodes. *Development*. 2010 6; 137(11):1777–1785. doi: [10.1242/dev.040055](https://doi.org/10.1242/dev.040055).
- 433 **Langenberg T**, Kahana A, Wszalek JA, Halloran MC. The eye organizes neural crest cell migration. *Developmen-*  
434 *tal dynamics : an official publication of the American Association of Anatomists*. 2008 6; 237(6):1645–1652.  
435 doi: [10.1002/dvdy.21577](https://doi.org/10.1002/dvdy.21577).

- 436 **Lee RTH**, Knapik EW, Thiery JP, Carney TJ. An exclusively mesodermal origin of fin mesenchyme demonstrates  
437 that zebrafish trunk neural crest does not generate ectomesenchyme. *Development (Cambridge, England)*.  
438 2013 7; 140(14):2923–2932. doi: [10.1242/dev.093534](https://doi.org/10.1242/dev.093534).
- 439 **Lee RTH**, Asharani VP, Carney TJ. Basal keratinocytes contribute to all strata of the adult zebrafish epidermis.  
440 *PLoS ONE*. 2014 1; 9(1):e84858. doi: [10.1371/journal.pone.0084858](https://doi.org/10.1371/journal.pone.0084858).
- 441 **Lleras Forero L**, Narayanan R, Huitema LFA, Vanbergen M, Apschner A, Peterson-Maduro J, Logister I, Valentin  
442 G, Morelli LG, Oates AC, Schulte-Merker S. Segmentation of the zebrafish axial skeleton relies on notochord  
443 sheath cells and not on the segmentation clock. *eLife*. 2018 4; 7:e33843. doi: [10.7554/eLife.33843](https://doi.org/10.7554/eLife.33843).
- 444 **Maradonna F**, Gioacchini G, Falcinelli S, Bertotto D, Radaelli G, Olivotto I, Carnevali O. Probiotic supplementa-  
445 tion promotes calcification in *Danio rerio* larvae: A molecular study. *PLoS ONE*. 2013 12; 8(12):e83155. doi:  
446 [10.1371/journal.pone.0083155](https://doi.org/10.1371/journal.pone.0083155).
- 447 **Martin GR**. The roles of FGFs in the early development of vertebrate limbs. *Genes and Development*. 1998;  
448 doi: [10.1101/gad.12.11.1571](https://doi.org/10.1101/gad.12.11.1571).
- 449 **Morin-Kensicki EM**, Eisen JS. Sclerotome development and peripheral nervous system segmentation in em-  
450 bryonic zebrafish. *Development*. 1997 1; 124(1):159–167.
- 451 **Perli SD**, Cui CH, Lu TK. Continuous genetic recording with self-targeting CRISPR-Cas in human cells. *Science*.  
452 2016 9; 353(6304):aag0511. doi: [10.1126/science.aag0511](https://doi.org/10.1126/science.aag0511).
- 453 **Raj B**, Wagner DE, McKenna A, Pandey S, Klein AM, Shendure J, Gagnon JA, Schier AF. Simultaneous single-cell  
454 profiling of lineages and cell types in the vertebrate brain. *Nature Biotechnology*. 2018; 36(5):442–450. doi:  
455 [10.1038/nbt.4103](https://doi.org/10.1038/nbt.4103).
- 456 **Salvador-Martínez I**, Grillo M, Averof M, Telford MJ. Is it possible to reconstruct an accurate cell lineage using  
457 CRISPR recorders? *eLife*. 2019 1; 8. doi: [10.7554/eLife.40292](https://doi.org/10.7554/eLife.40292).
- 458 **Soules KA**, Link BA. Morphogenesis of the anterior segment in the zebrafish eye. *BMC developmental biology*.  
459 2005 6; 5:12. doi: [10.1186/1471-213X-5-12](https://doi.org/10.1186/1471-213X-5-12).
- 460 **Spanjaard B**, Hu B, Mitic N, Olivares-Chauvet P, Janjuha S, Ninov N, Junker JP. Simultaneous lineage tracing and  
461 cell-type identification using CrisPr-Cas9-induced genetic scars. *Nature Biotechnology*. 2018; 36(5):469–473.  
462 doi: [10.1038/nbt.4124](https://doi.org/10.1038/nbt.4124).
- 463 **Sulston JE**, Horvitz HR. Post-embryonic cell lineages of the nematode, *Caenorhabditis elegans*. *Developmental*  
464 *biology*. 1977 3; 56(1):110–156. doi: [10.1016/0012-1606\(77\)90158-0](https://doi.org/10.1016/0012-1606(77)90158-0).
- 465 **Sulston JE**, Schierenberg E, White JG, Thomson JN. The embryonic cell lineage of the nematode *Caenorhabditis*  
466 *elegans*. *Developmental Biology*. 1983; 100(1):64–119. doi: [10.1016/0012-1606\(83\)90201-4](https://doi.org/10.1016/0012-1606(83)90201-4).
- 467 **Sun SK**, Dee CT, Tripathi VB, Rengifo A, Hirst CS, Scotting PJ. Epibranchial and otic placodes are induced by  
468 a common Fgf signal, but their subsequent development is independent. *Developmental Biology*. 2007 3;  
469 303(2):675–686. doi: [10.1016/j.ydbio.2006.12.008](https://doi.org/10.1016/j.ydbio.2006.12.008).
- 470 **Tamm ER**. [Development of the iridocorneal angle and congenital glaucoma]. *Der Ophthalmologe : Zeitschrift*  
471 *der Deutschen Ophthalmologischen Gesellschaft*. 2011 7; 108(7):610–614,616–617. doi: [10.1007/s00347-  
472 \*010-2294-5\*.](https://doi.org/10.1007/s00347-010-2294-5)
- 473 **Teixeira Rosa J**, Oralová V, Larionova D, Eisenhoffer GT, Eckhard Witten P, Huisseune A. Periderm inva-  
474 sion contributes to epithelial formation in the teleost pharynx. *Scientific Reports*. 2019 7; 9(1):10082. doi:  
475 [10.1038/s41598-019-46040-y](https://doi.org/10.1038/s41598-019-46040-y).
- 476 **Thisse C**, Thisse B. High-resolution in situ hybridization to whole-mount zebrafish embryos. *Nature Protocols*.  
477 2008; 3:59–69. doi: [10.1038/nprot.2007.514](https://doi.org/10.1038/nprot.2007.514).
- 478 **Trapnell C**, Cacchiarelli D, Grimsby J, Pokharel P, Li S, Morse M, Lennon NJ, Livak KJ, Mikkelsen TS, Rinn JL.  
479 The dynamics and regulators of cell fate decisions are revealed by pseudotemporal ordering of single cells.  
480 *Nature biotechnology*. 2014; 32(4):381. doi: [10.1038/nbt.2859](https://doi.org/10.1038/nbt.2859).
- 481 **Wang GCY**, Wang Y. Frequency of formation of chimeric molecules as a consequence of PCR coamplifica-  
482 tion of 16S rRNA genes from mixed bacterial genomes. *Applied and Environmental Microbiology*. 1997 12;  
483 63(12):4645–4650. doi: [10.1128/aem.63.12.4645-4650.1997](https://doi.org/10.1128/aem.63.12.4645-4650.1997).

- 484 **Watterson G.** On the number of segregating sites in genetical models without recombination. *Theoretical*  
485 *population biology.* 1975; 7(2):256–276. doi: 10.1016/0040-5809(75)90020-9.
- 486 **Wikstrom SO,** Anniko M. Early development of the stato-acoustic and facial ganglia. *Acta oto-laryngologica.*  
487 1987; 104(1-2):166–174. doi: 10.3109/00016488709109063.
- 488 **Ye C,** Chen Z, Liu Z, Wang F, He X. Defining endogenous barcoding sites for CRISPR/Cas9-based cell lineage  
489 tracing in zebrafish. *Journal of Genetics and Genomics.* 2020 2; doi: [10.1016/J.JGG.2019.11.012](https://doi.org/10.1016/J.JGG.2019.11.012).
- 490 **Yoshikawa S,** Norcom E, Nakamura H, Yee RW, Zhao XC. Transgenic analysis of the anterior eye-specific en-  
491 hancers of the zebrafish gelsolin-like 1 (gsnl1) gene. *Developmental dynamics : an official publication of the*  
492 *American Association of Anatomists.* 2007 7; 236(7):1929–1938. doi: [10.1002/dvdy.21197](https://doi.org/10.1002/dvdy.21197).
- 493 **Zhang J,** Wagh P, Guay D, Sanchez-Pulido L, Padhi BK, Korzh V, Andrade-Navarro MA, Akimenko MA. Loss of  
494 fish actinotrichia proteins and the fin-to-limb transition. *Nature.* 2010 7; 466(7303):234–237. doi: 10.1038/na-  
495 ture09137.
- 496 **Zhong TP,** Childs S, Leu JP, Fishman MC. Gridlock signalling pathway fashions the first embryonic artery. *Nature.*  
497 2001; doi: 10.1038/35102599.

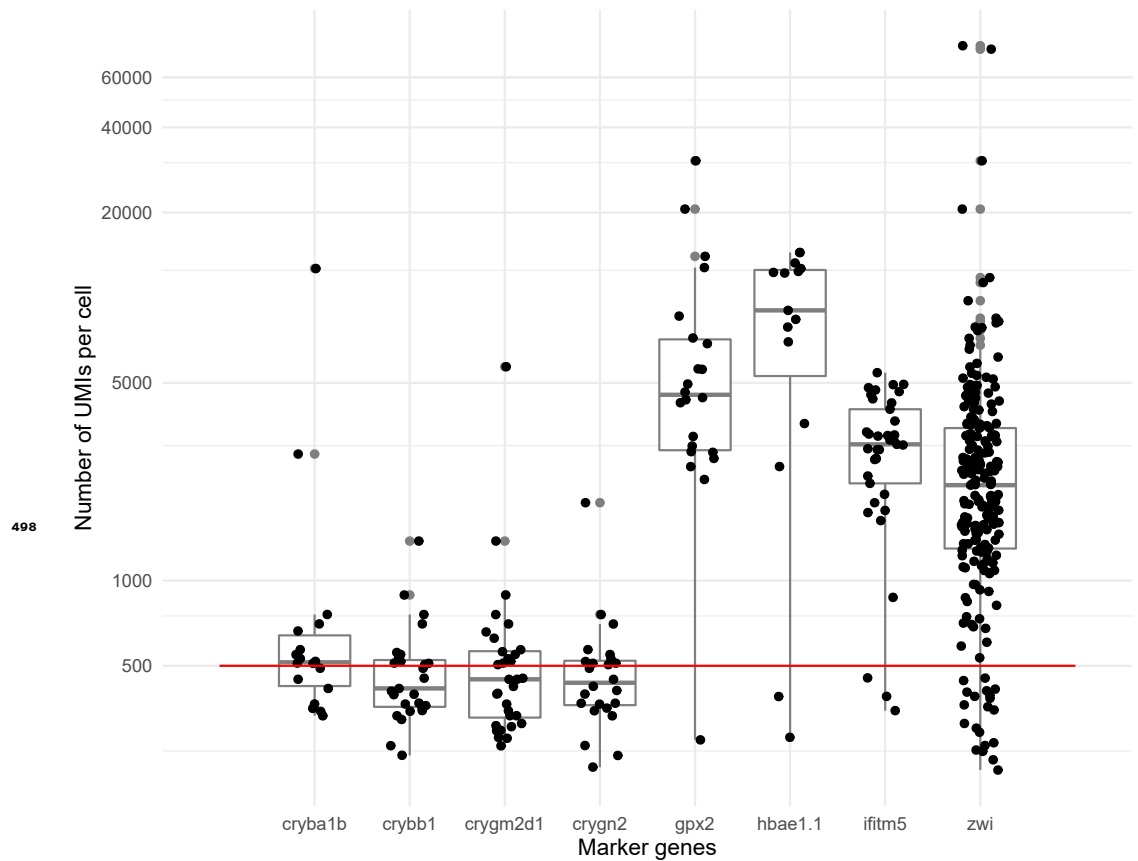

**Figure 1-Figure supplement 1.** The distribution of UMI number per cell with different marker genes. Most of the cells with lens marker genes ( $\geq 2$  UMIs, *cryba1b*, *crybb1*, *crygm2d1*, *crygn2*) had unique reads that were fewer than 500, which is the threshold for consideration as a real cell; whereas a large proportion of cells with other marker genes ( $\geq 2$  UMIs, *gpx2*, *hbae1.1*, *ifitm5*, *zwi*) could pass this threshold. Part of the cells with different lens marker genes overlapped.



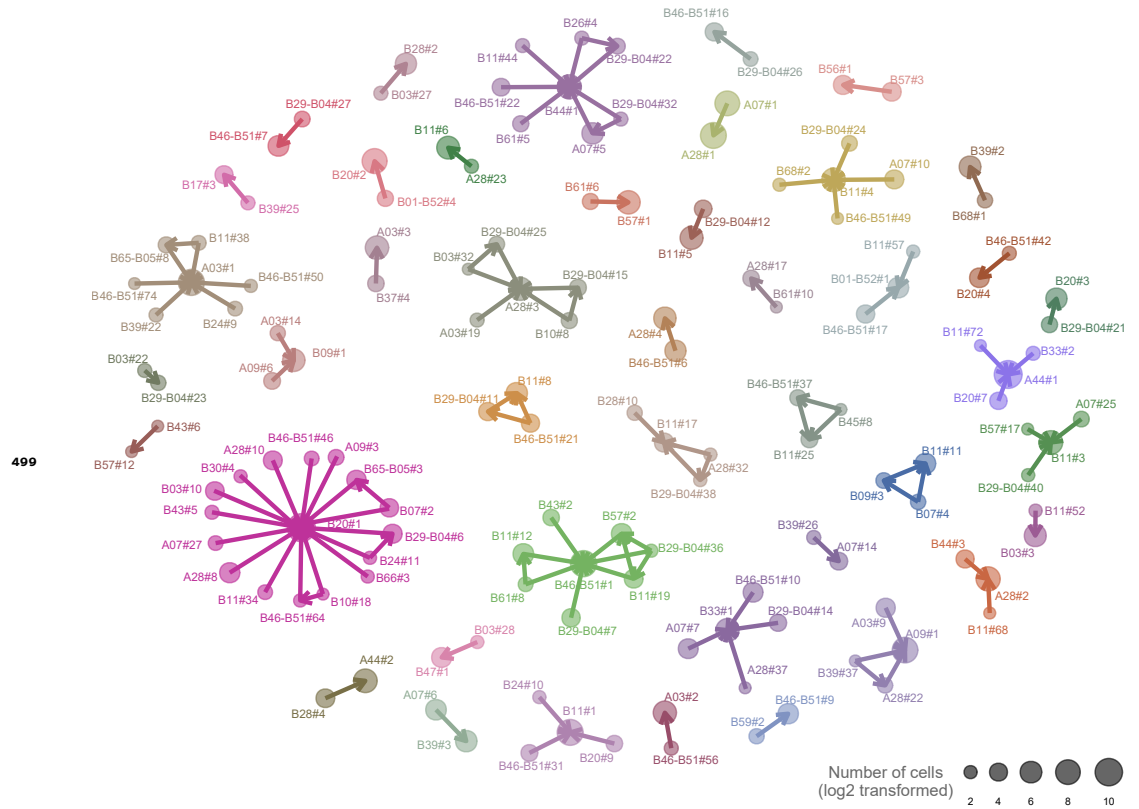

**Figure 2-Figure supplement 1.** Network relationships of non-recurring scars. The arrows indicate a scar that belongs to the descent to which it points. The size of each point represents the number of cells marked by that scar ( $\log_2$  scale). The colors indicate different sub-networks of scar relationships, totaling 42 sub-networks.

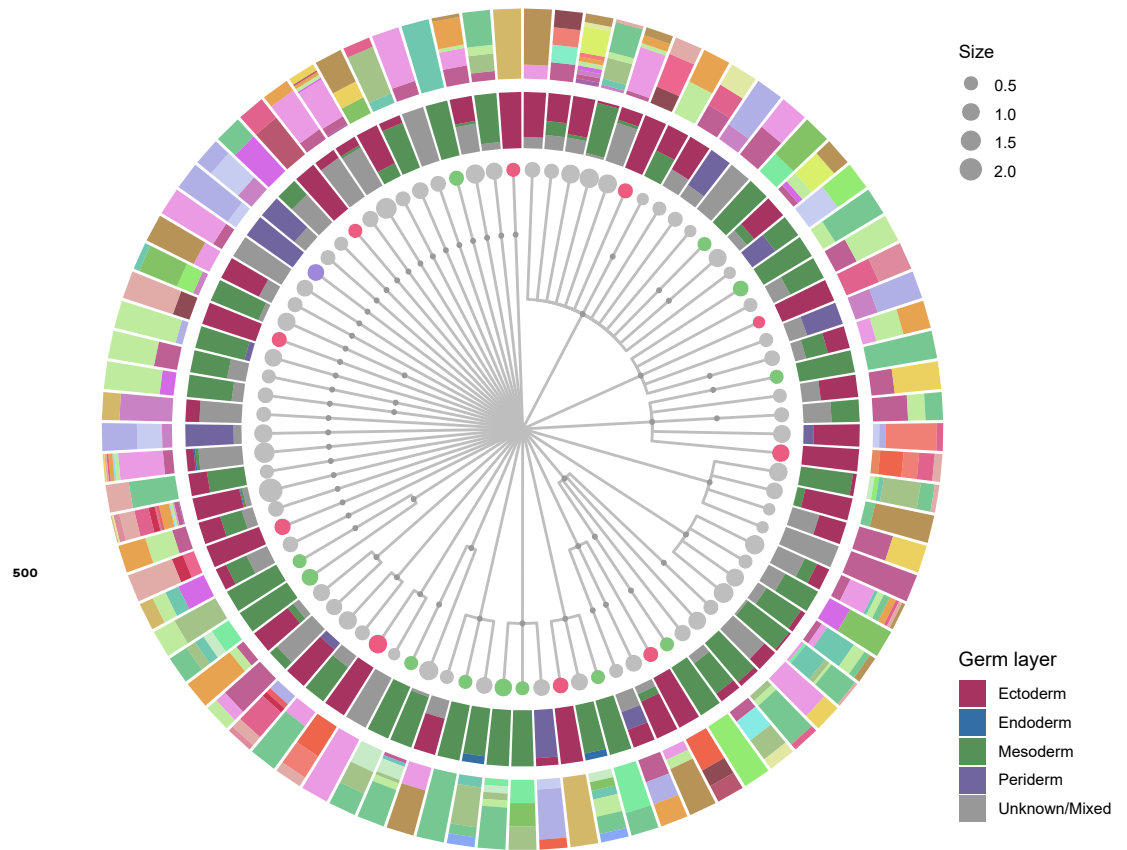

**Figure 2-Figure supplement 2.** The reconstructed lineage tree for 7 days post-fertilization zebrafish larva. Only unambiguously placed scars were used for lineage reconstruction. Cells were placed to the terminal nodes according to their scar profiles. The terminal node size was scaled by the number of cells within that node ( $\log_10$ -transformed) and colored as if it was purely comprised of cells from a single germ layer. The intermediate ring of the histogram refers to the relative proportions of different germ layers. The color code is indicated in the legend. The outer ring of the histogram shows the fractions of cell types within the terminal nodes and the color code is as in Figure 1.

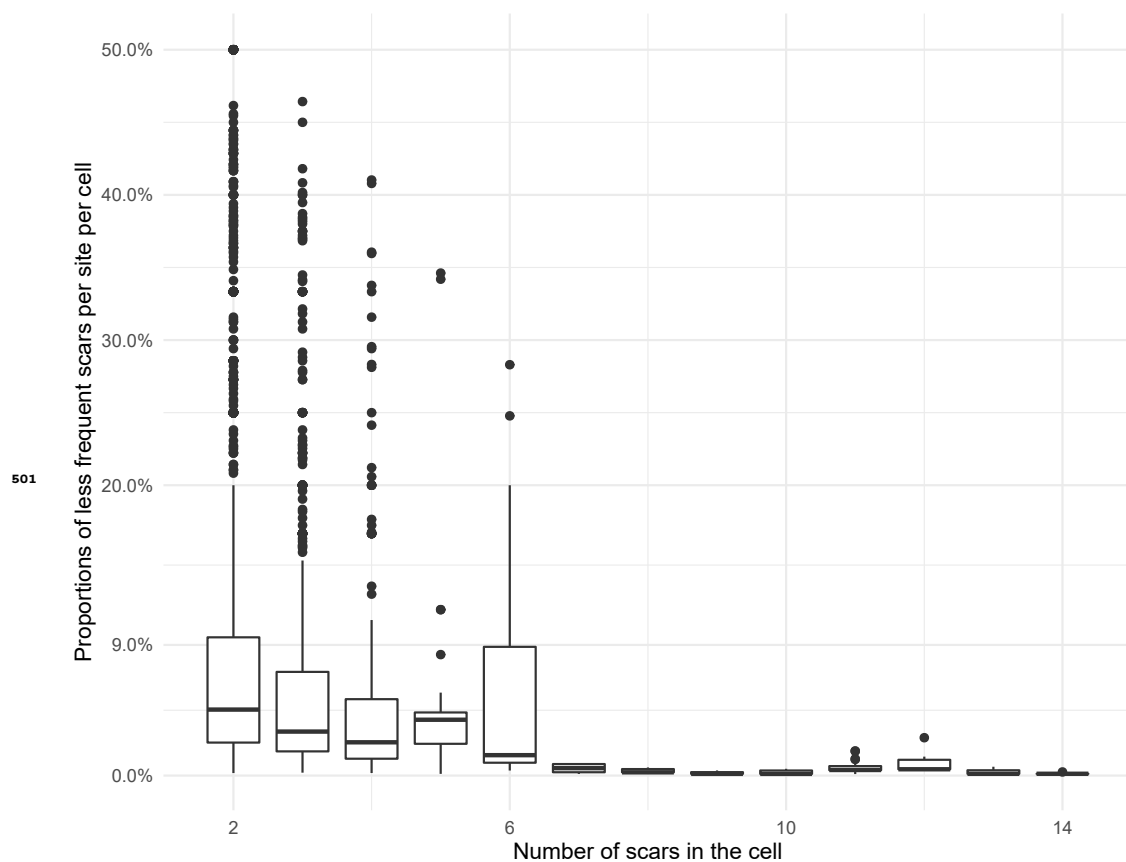

**Figure 2-Figure supplement 3.** Proportions of less frequent scars per site in individual cells with various number of scars. The 75% quantile of all less frequent scars is ~9%.

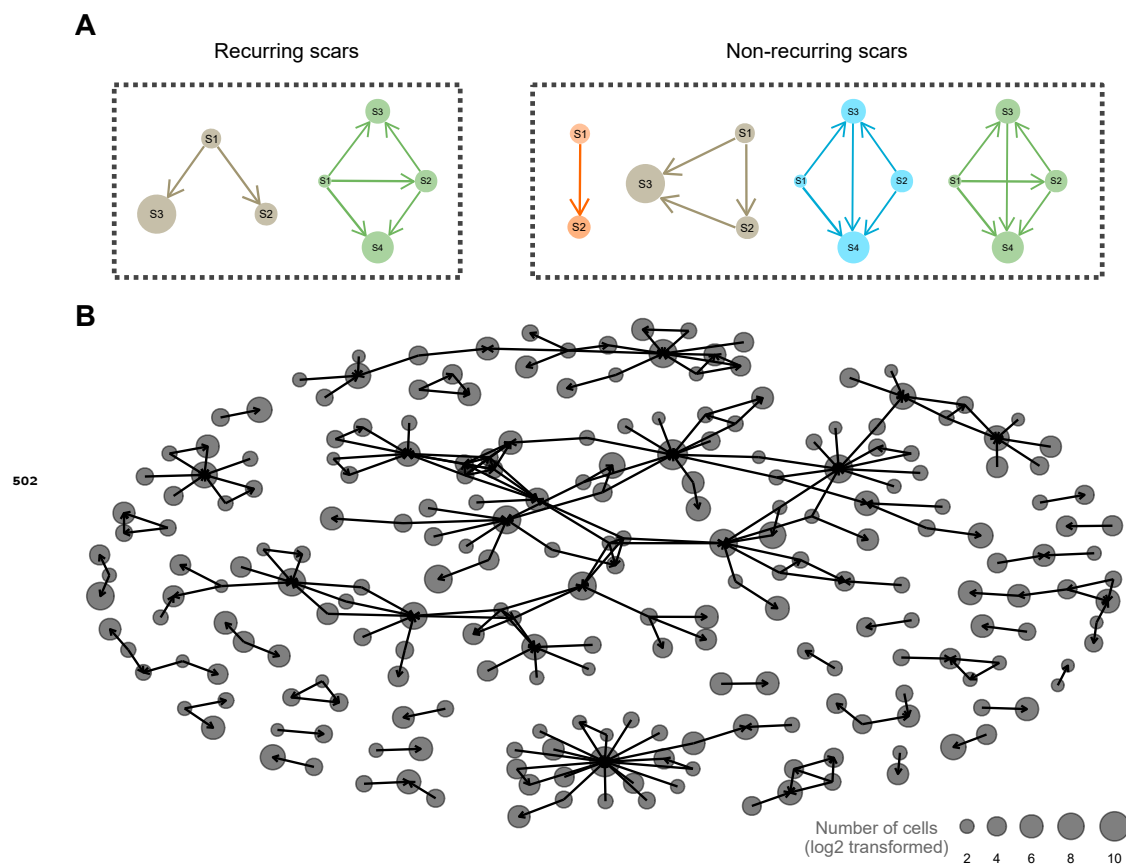

**Figure 2-Figure supplement 4.** Scar networks before filtering. **(A)** Discrimination of recurring scars and non-recurring scars. **(B)** Scar networks before filtering out recurring scars.

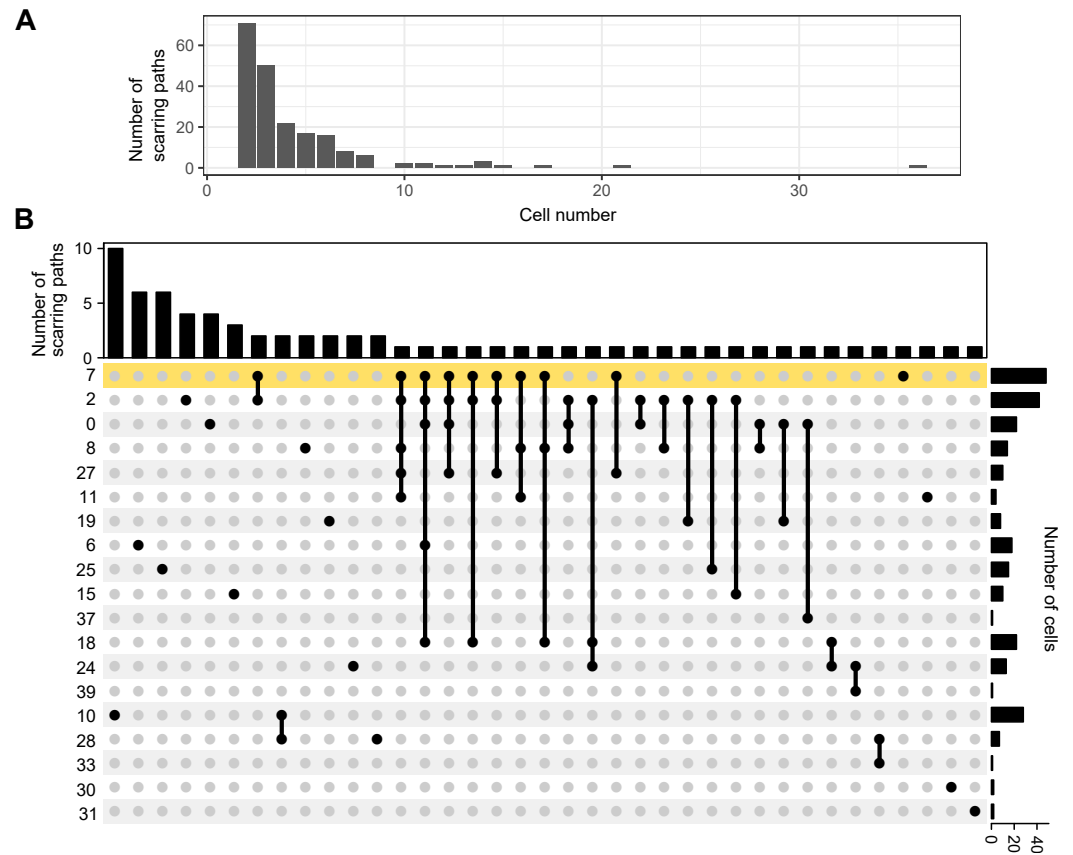

**Figure 3–Figure supplement 1.** Lineage information for simulation. **(A)** Distribution of the number of cells within each filtered scarring path. **(B)** Upset plot for the number of scarring paths detected within or between cell types from the ectoderm. The yellow shade represents multipotent stem cells.

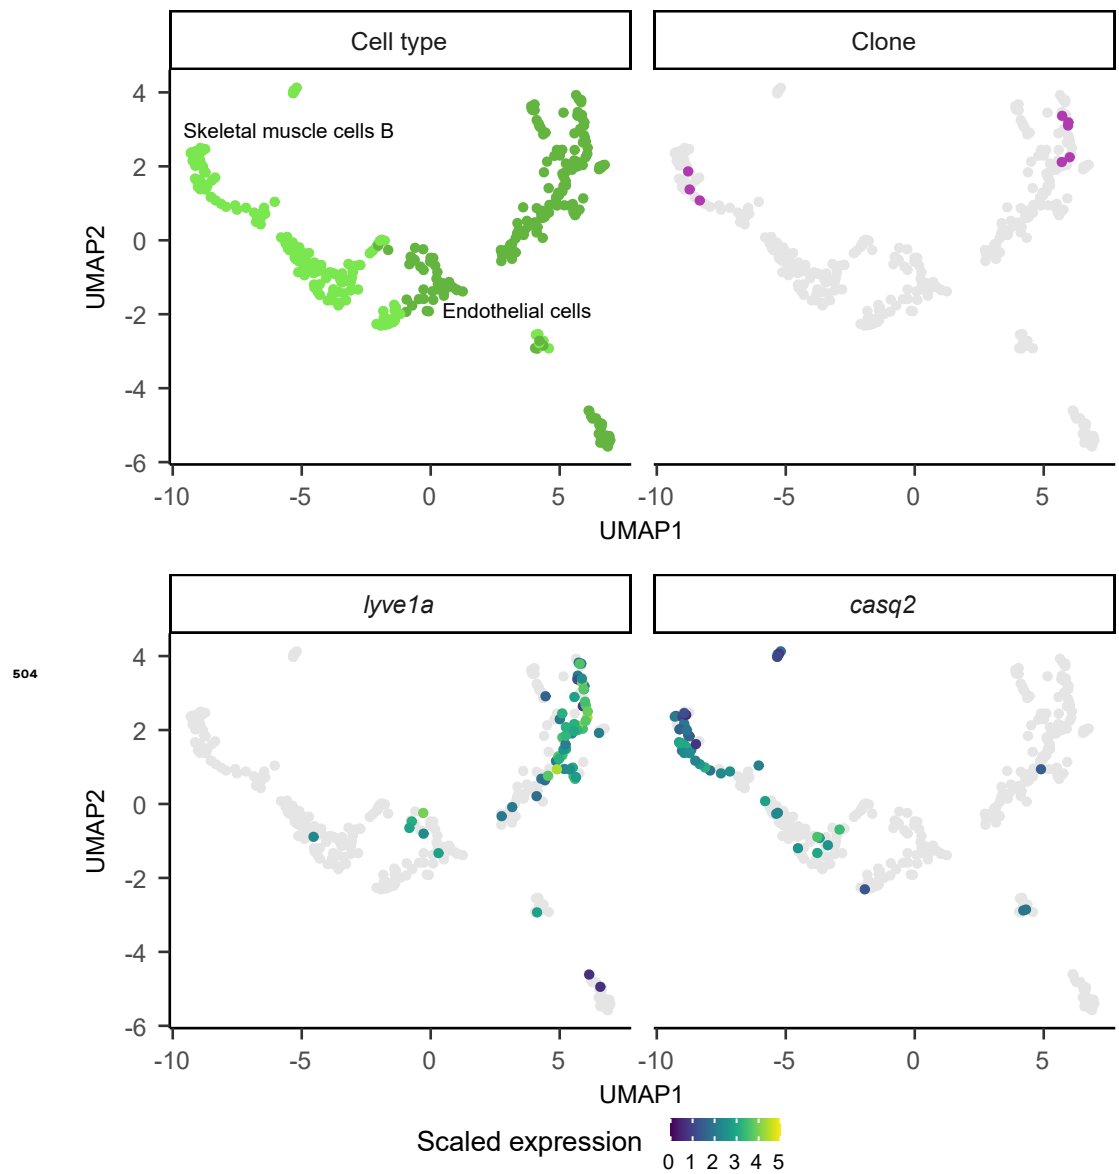

**Figure 3-Figure supplement 2.** Fin muscle cells share a close relationship with endothelial cells. UMAP visualization of skeletal muscle cells B and endothelial cells (top left) and the cells marked by the same scarring path (top right). The color code for the cell types is as in **Figure 1**. Expression patterns of marker genes for cardinal vein endothelial cells (*lyve1a*, bottom left) and fin muscle cells (*casq2*, bottom right).

**A**

|                           | scGESTALT<br>(Raj <i>et al.</i> ) | LINNAEUS<br>(Spanjaard <i>et al.</i> ) | ScarTrace<br>(Alemany <i>et al.</i> ) | (Chan <i>et al.</i> ) | scLOESS<br>(our method)    |
|---------------------------|-----------------------------------|----------------------------------------|---------------------------------------|-----------------------|----------------------------|
| Organism                  | Zebrafish                         | Zebrafish                              | Zebrafish                             | Mouse                 | Zebrafish                  |
| Number of barcoding sites | 10                                | 16-32                                  | 8                                     | 9-45                  | 49 (78)*                   |
| Distinguishable barcode   | No, tandem                        | No                                     | No                                    | Yes                   | Yes                        |
| Scattered barcode         | No, tandem                        | Yes                                    | No, tandem                            | Yes                   | Yes                        |
| Recovery rate             | 6-28%                             | 14-99%**                               | 90%**                                 | 15-73%**              | 83-99% per site***         |
| Reconstruction strategy   | Camin-Sokal                       | Custom (maximum parsimony)             | Clonal analysis                       | Custom greedy         | Custom (maximum parsimony) |

\* denotes the number of barcoding sites after filtering and the number in the parentheses is the initial barcoding site number

\*\* denotes their recovery rates is represented for  $\geq 1$  site

\*\*\* denotes the recovery rates of individual filtered barcoding sites

**B**

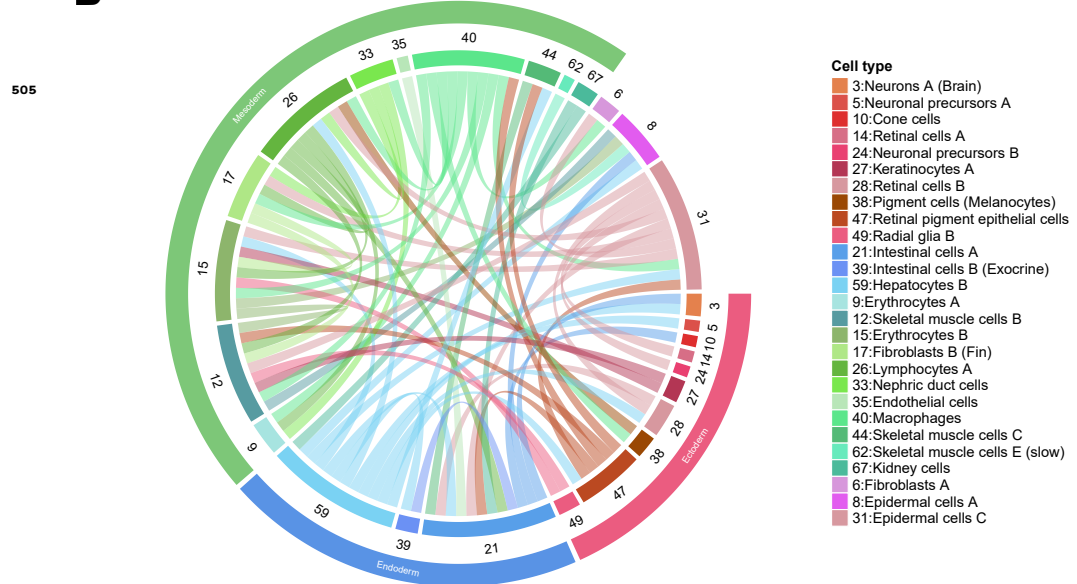

**Figure 3–Figure supplement 3.** Comparison of various methods for single-cell lineage tracing in vertebrates. **(A)** Table summarizing contemporary Cas9-based lineage recording strategies for vertebrates. **(B)** Chord diagram of cell-type relationships for 5 days post-fertilization larvae ( $n = 7$ ) based on the enrichment of scar connections (only  $p_{adj} < 0.01$  are shown) between cell types from *Spanjaard et al. (2018)*. This is the same as *Supplementary Figure 8c* in that study, but with a different representation.

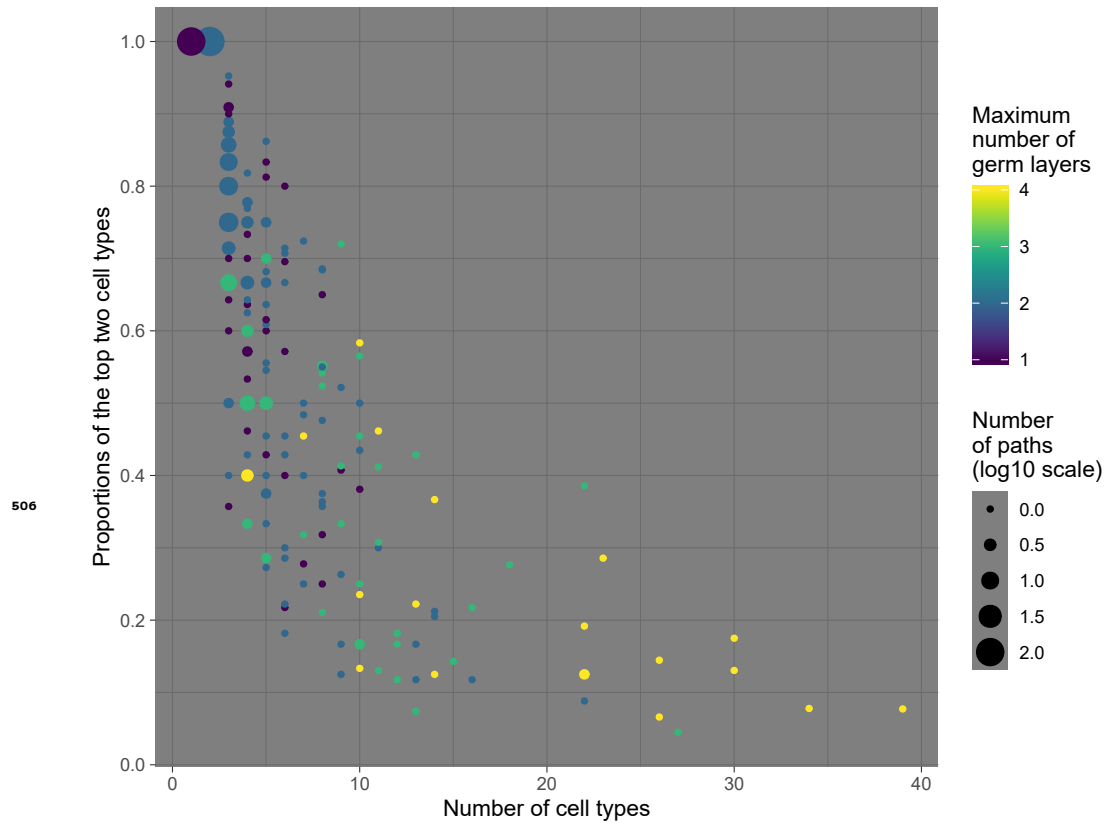

**Figure 3-Figure supplement 4.** The relationship of the number of cell types and the proportions of the top two cell types in each scarring path. Because different scarring paths may have the same number of cell types and proportions, each point may represent more than one path and the point size is scaled by the number of paths (log10 scale). Points are colored by the maximum number of germ layers of each point.



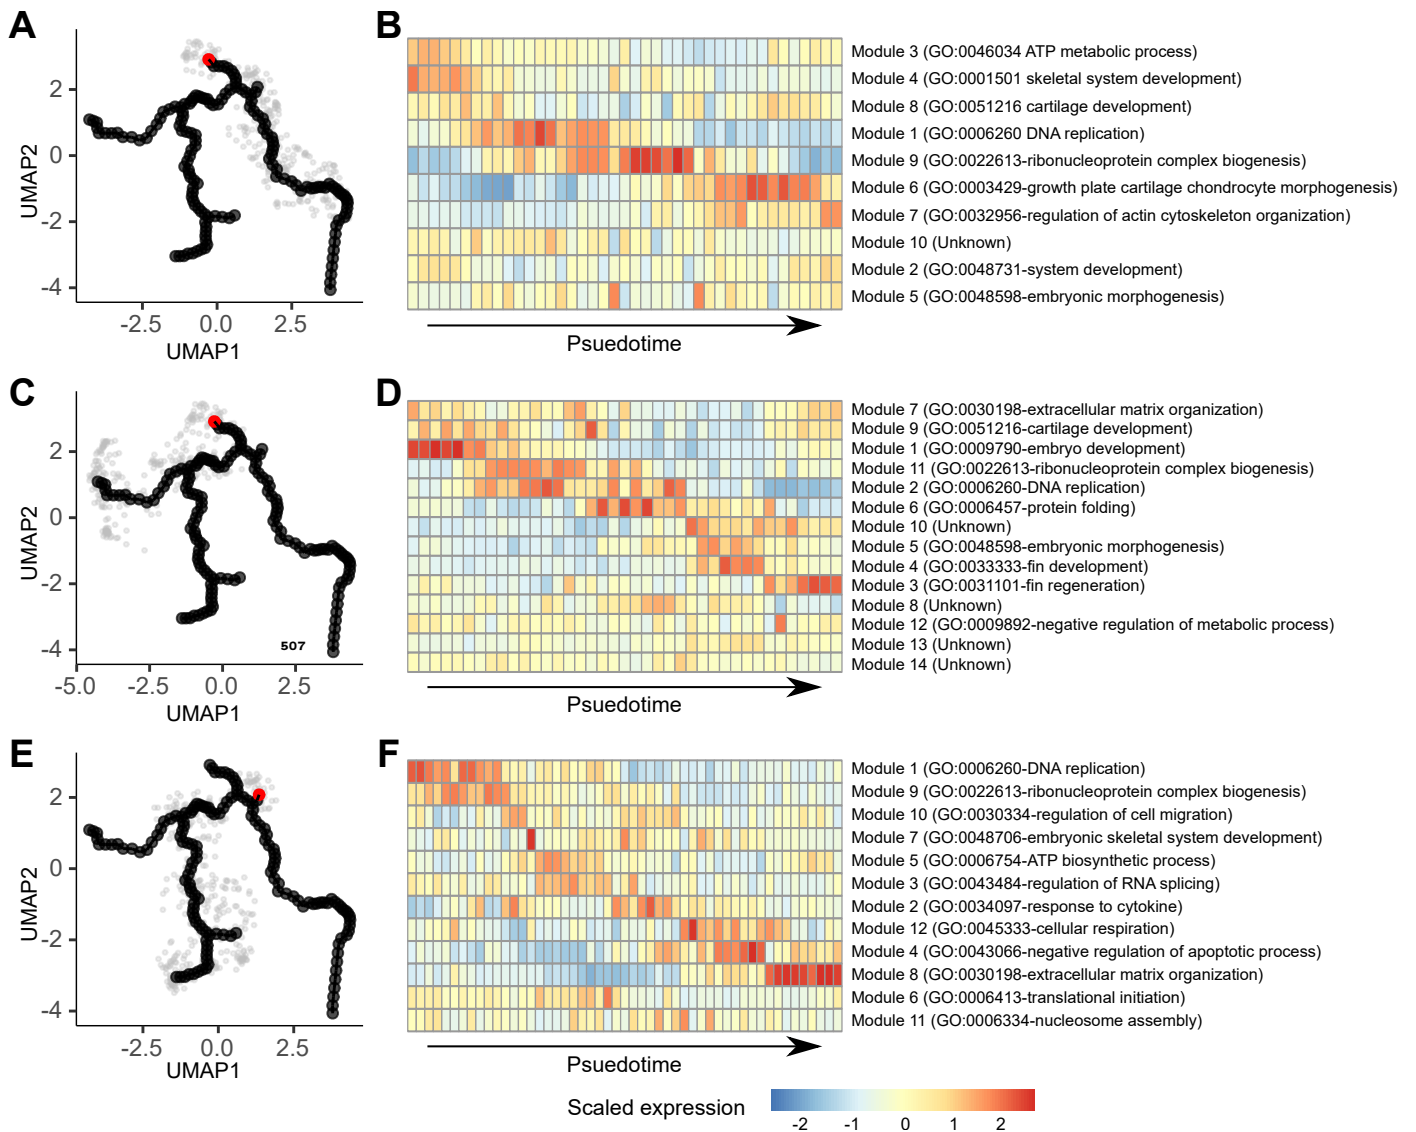

**Figure 4-Figure supplement 1.** Transcriptional transition along different trajectories. **(A, C, E)** Selected cells along one of the trajectories. The red nodes represent the starting points of each pseudo-time analyses. **(B, D, F)** The gene modules change along the trajectories and the representative gene ontology for each module.

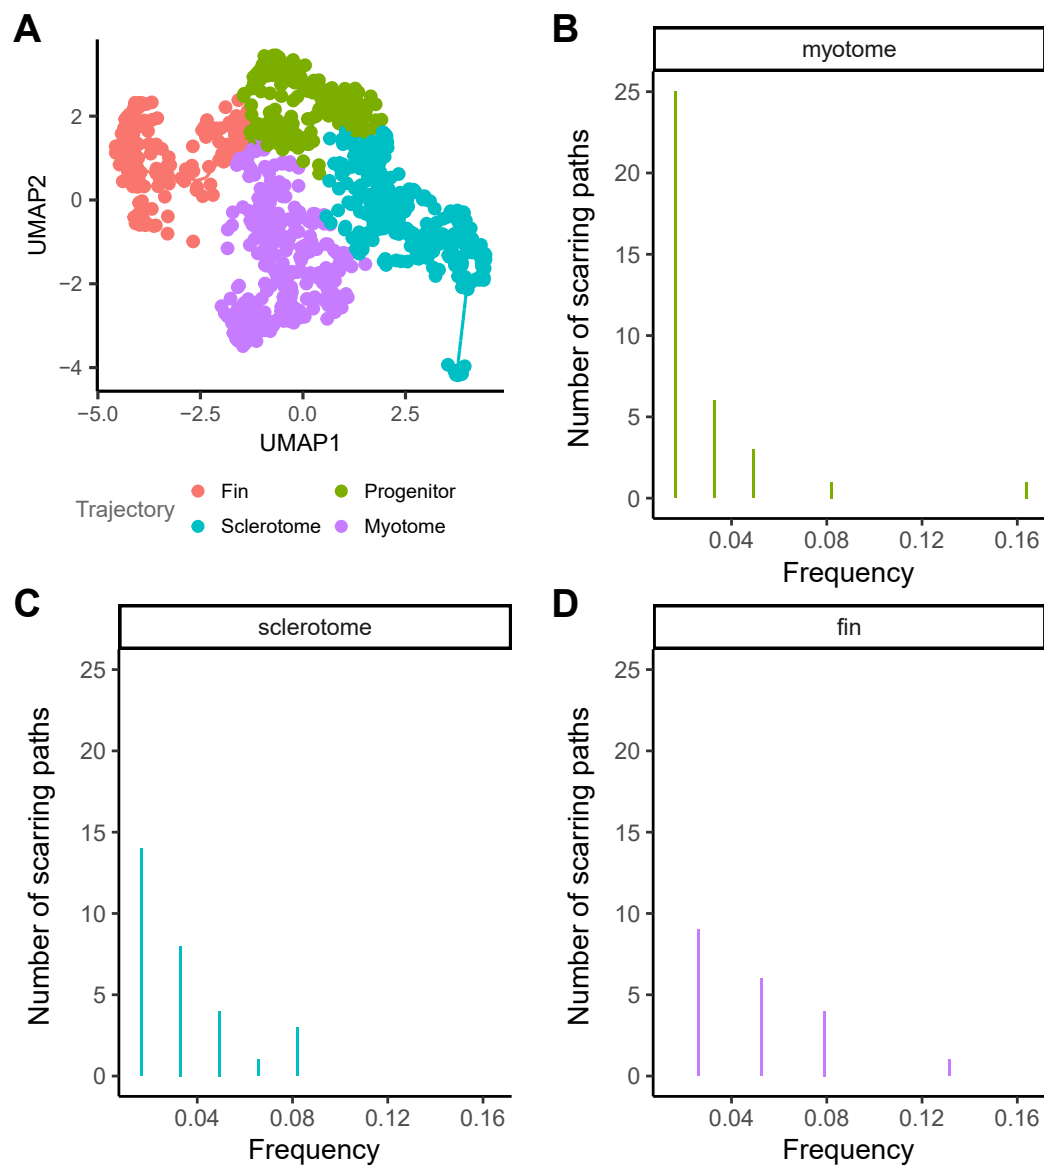

**Figure 4-Figure supplement 2.** Site frequency spectrum of different trajectories. **(A)** UMAP visualization of cells in the paraxial mesoderm colored by the trajectory to which they belong. **(B-D)** Frequency distribution of different scarring paths within distinct trajectories.
